# Supplementary material for: Cellulitis in children: a retrospective single centre study from Australia
Source: PubMed Central journal article supplement — BMJ Paediatr Open. 2021 Jul 16;5(1):e001130. doi: 10.1136/bmjpo-2021-001130 (PMC8287612; doi:10.1136/bmjpo-2021-001130), 2021-07-16
Supplement: bmjpo-2021-001130.draft_revisions.pdf [file bmjpo-2021-001130.draft_revisions.pdf]

# BMJ Paediatrics Open

BMJ Paediatrics Open is committed to open peer review. As part of this commitment we make the peer review history of every article we publish publicly available.

When an article is published we post the peer reviewers' comments and the authors' responses online. We also post the versions of the paper that were used during peer review. These are the versions that the peer review comments apply to.

The versions of the paper that follow are the versions that were submitted during the peer review process. They are not the versions of record or the final published versions. They should not be cited or distributed as the published version of this manuscript.

BMJ Paediatrics Open is an open access journal and the full, final, typeset and author-corrected version of record of the manuscript is available on our site with no access controls, subscription charges or pay-per-view fees (<http://bmjpaedsopen.bmj.com>).

If you have any questions on BMJ Paediatrics Open's open peer review process please email [info.bmjpo@bmj.com](mailto:info.bmjpo@bmj.com)

# BMJ Paediatrics Open

## The BRiCK study: an analysis of the Burden and Response in Cellulitis in Kids

|                               |                                                                                                                                                                                                                                                                                                                                                                                                                                                                                                                                                                                                                                             |
|-------------------------------|---------------------------------------------------------------------------------------------------------------------------------------------------------------------------------------------------------------------------------------------------------------------------------------------------------------------------------------------------------------------------------------------------------------------------------------------------------------------------------------------------------------------------------------------------------------------------------------------------------------------------------------------|
| Journal:                      | <i>BMJ Paediatrics Open</i>                                                                                                                                                                                                                                                                                                                                                                                                                                                                                                                                                                                                                 |
| Manuscript ID                 | bmjpo-2021-001130                                                                                                                                                                                                                                                                                                                                                                                                                                                                                                                                                                                                                           |
| Article Type:                 | Original research                                                                                                                                                                                                                                                                                                                                                                                                                                                                                                                                                                                                                           |
| Date Submitted by the Author: | 17-Apr-2021                                                                                                                                                                                                                                                                                                                                                                                                                                                                                                                                                                                                                                 |
| Complete List of Authors:     | Salleo, Elise; The University of Western Australia Faculty of Medicine Dentistry and Health Sciences, Medical School; Telethon Kids Institute, MacKay, Conor; The University of Western Australia Faculty of Medicine Dentistry and Health Sciences, Medical School; Telethon Kids Institute, Cannon, Jeffrey; The University of Western Australia Faculty of Medicine Dentistry and Health Sciences, Medical School; Telethon Kids Institute, King, Barbara; Albany Hospital<br>Bowen, Asha; Perth Children's Hospital, Department of Infectious Diseases; Telethon Kids Institute, Wesfarmers Centre for Vaccines and Infectious Diseases |
| Keywords:                     | Epidemiology, Microbiology, Dermatology                                                                                                                                                                                                                                                                                                                                                                                                                                                                                                                                                                                                     |
|                               |                                                                                                                                                                                                                                                                                                                                                                                                                                                                                                                                                                                                                                             |

SCHOLARONE™  
Manuscripts

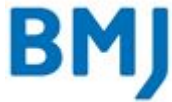

I, the Submitting Author has the right to grant and does grant on behalf of all authors of the Work (as defined in the below author licence), an exclusive licence and/or a non-exclusive licence for contributions from authors who are: i) UK Crown employees; ii) where BMJ has agreed a CC-BY licence shall apply, and/or iii) in accordance with the terms applicable for US Federal Government officers or employees acting as part of their official duties; on a worldwide, perpetual, irrevocable, royalty-free basis to BMJ Publishing Group Ltd ("BMJ") its licensees and where the relevant Journal is co-owned by BMJ to the co-owners of the Journal, to publish the Work in this journal and any other BMJ products and to exploit all rights, as set out in our [licence](#).

The Submitting Author accepts and understands that any supply made under these terms is made by BMJ to the Submitting Author unless you are acting as an employee on behalf of your employer or a postgraduate student of an affiliated institution which is paying any applicable article publishing charge ("APC") for Open Access articles. Where the Submitting Author wishes to make the Work available on an Open Access basis (and intends to pay the relevant APC), the terms of reuse of such Open Access shall be governed by a Creative Commons licence – details of these licences and which [Creative Commons](#) licence will apply to this Work are set out in our licence referred to above.

Other than as permitted in any relevant BMJ Author's Self Archiving Policies, I confirm this Work has not been accepted for publication elsewhere, is not being considered for publication elsewhere and does not duplicate material already published. I confirm all authors consent to publication of this Work and authorise the granting of this licence.

1  
2  
3 **Title:** The BRICK study: an analysis of the Burden and Response in Cellulitis in Kids  
4  
5

6 **Short Title:** Cellulitis Burden and Response  
7

8 ORIGINAL ARTICLE  
9

10 **Authors:** Elise Salleo<sup>1</sup>, Conor I. MacKay<sup>1</sup>, Barbara King<sup>2</sup>, Jeffrey Cannon<sup>1,4</sup> and Asha C.  
11 Bowen<sup>1,3,4</sup>  
12

13 <sup>1</sup>School of Medicine, The University of Western Australia, Perth, Western Australia  
14

15 <sup>2</sup>Albany Health Campus, Western Australian Country Health Service, Albany, Western  
16 Australia  
17

18 <sup>3</sup>Department of Infectious Diseases, Perth Children's Hospital, Perth, Western Australia  
19

20 <sup>4</sup>Wesfarmers Centre for Vaccines and Infectious Diseases, Telethon Kids Institute, The  
21 University of Western Australia, Perth, Western Australia  
22

23 **Corresponding Author:**

24 A/Prof Asha Bowen

25 Telethon Kids Institute

26 15 Hospital Ave

27 Nedlands WA 6009

28 Asha.bowen@telethonkids.org.au

29 08 6456 5362  
30  
31  
32

33 **Key words:**

34 Cellulitis; skin and soft tissue infections; Children; *Staphylococcus aureus*; *Streptococcus*  
35 *pyogenes*  
36  
37

38 **Word Count:** 2357  
39  
40  
41  
42  
43  
44  
45  
46  
47  
48  
49  
50  
51  
52  
53  
54  
55  
56  
57  
58  
59  
60

## Abstract

**Aim:** To characterise the epidemiology, clinical features and treatment of paediatric cellulitis.

**Methods:** A retrospective study of children presenting to a paediatric tertiary hospital in Western Australia, Australia in 2018.

**Results:** 302 episodes of cellulitis were included comprising 206 (68.2%) admitted children and 96 (31.8%) non-admitted children. The median age was 5 years (interquartile range [IQR] 2-9), 40 (13.2%) were Aboriginal and 180 (59.6%) male. The extremities were the most commonly affected body site amongst admitted and non-admitted patients. Admitted patients were more likely to have facial cellulitis compared with non-admitted patients (27.2% vs 5.2%,  $p < 0.01$ ). Wound swab was the most frequent microbiological investigation (133/302, 44.0%), yielding positive cultures in the majority of those tested (111/133, 83.5%). The most frequent organisms identified were *Staphylococcus aureus* (94/111, 84.7%) (methicillin susceptible *S. aureus* (60/94, 63.8%), methicillin resistant *S. aureus* (34/94, 36.2%)) and *Streptococcus pyogenes* (22/111, 19.8%) with 14 identifying both *S. aureus* and *S. pyogenes*. Intravenous (IV) flucloxacillin was the preferred antibiotic (154/199, 77.4%), with median IV duration 2 days (IQR 2-3), oral 6 days (IQR 5-7) and total 8 days (IQR 7-10).

**Conclusions:** Cellulitis is a common reason for presentation to a tertiary paediatric hospital. We confirm a high prevalence of extremity cellulitis and demonstrate that children with facial cellulitis often require admission. Cellulitis disproportionately affected Aboriginal children and children below five years. Prevention involves early recognition and treatment of skin infections.

1  
2  
3 What is already known on this topic:  
4  
5

- 6 1. Cellulitis is a common skin infection, caused by *Staphylococcus aureus* and  
7 *Streptococcus pyogenes*.  
8  
9
- 10 2. Cellulitis contributes the largest portion of the disease burden caused by *S. pyogenes*  
11 in Australia.  
12  
13
- 14 3. Cellulitis in children includes periorbital infection and infection of the extremities.  
15  
16  
17  
18  
19  
20

21 What this paper adds:  
22  
23

- 24 1. Cellulitis is a common condition in children accounting for 1.1% of  
25 presentations to the paediatric tertiary hospital in Western Australia.  
26  
27
- 28 2. Facial cellulitis is a common cause for admission to hospital, with a large  
29 proportion of this being periorbital cellulitis.  
30  
31
- 32 3. Children under five years and Australian Aboriginal children are  
33 disproportionately admitted for cellulitis.  
34  
35  
36  
37  
38  
39  
40  
41  
42  
43  
44  
45  
46  
47  
48  
49  
50  
51  
52  
53  
54  
55  
56  
57  
58  
59  
60

## Introduction

Cellulitis is a localised skin infection due to disruption of the physical barrier allowing pathogen entry.<sup>1,2</sup> In children it is commonly due to trauma, insect bites or varicella, predominantly affecting the face or extremities.<sup>2-4</sup> Common pathogens are *Streptococcus pyogenes* (Group A streptococci (GAS)) and *Staphylococcus aureus*.<sup>1,2,6-8</sup> Cellulitis is non-purulent, making pathogen detection challenging, hence GAS contribution may be underestimated.<sup>1</sup> In Australia, cellulitis contributes the greatest burden of GAS disease across all ages, ahead of impetigo, pharyngitis and invasive GAS.<sup>9</sup> An improved understanding of the burden of paediatric cellulitis will inform the role for a GAS vaccine in cellulitis prevention.

Although presumably common, few studies describe the burden of cellulitis in Australian children. The proportion of admissions, clinical features and treatment of cellulitis in hospitalised children in Australia remains unknown. In one linked dataset, skin and soft tissue infections (SSTI) accounted for 3% of all paediatric hospital admissions, with cellulitis as the second most frequent admission reason.<sup>5</sup> Aboriginal children were 15 times more likely to be admitted for SSTI compared to non-Aboriginal.<sup>5</sup> Furthermore, SSTI are recognised as the most common group of bacterial infections in children.<sup>10</sup> Although cellulitis is often managed in primary care, hospitalisation is required for severe, progressive cellulitis.<sup>5,11,12</sup>

We aimed to describe the epidemiology, clinical features, treatment and adherence to guidelines for cellulitis in children presenting to hospital.

## Methods

Study design and population

1  
2  
3 A retrospective chart review was conducted at Perth Children's Hospital (PCH), the only  
4 tertiary paediatric centre in Western Australia (WA) with an estimated 60,000 presentations  
5 to the Emergency Department (ED) annually.  
6  
7  
8  
9

10  
11 Records were identified using the International Classification of Disease (ICD) 10 coding for  
12 cellulitis (Table S1). At PCH, all inpatient records from 1 January to 31 December 2018 were  
13 screened for inclusion. Due to the time constraints of the study ED presentations from 1 July  
14 to 31 December 2018 only were reviewed. Exclusion criteria were patients aged  $\geq 16$  years,  
15 alternative diagnosis more likely on detailed chart review or where insufficient  
16 documentation was available to assess for inclusion. Orbital cellulitis and odontogenic  
17 cellulitis were excluded from this review, as their management is considerably different from  
18 that of traditional cellulitis.  
19  
20  
21  
22  
23  
24  
25  
26  
27  
28  
29

30  
31  
32 Cellulitis (ICD10 codes L03.01 – L03.11 and H60.1 – H60.13) is a bacterial infection of the  
33 superficial layers of the skin (epidermis, dermis and subcutaneous tissues) characterised by  
34 erythema, pain, warmth, swelling and rapid progression. Recurrent cellulitis was defined as  
35 an additional admission for cellulitis occurring  $>30$  days from the index diagnosis to exclude  
36 the possibility of counting relapses or treatment failure (representation within 30 days of  
37 hospital discharge). SSTI includes cellulitis, impetigo, skin abscess, scabies and fungal  
38 infections. Extremities are the hands and feet including digits. Geographical location was  
39 ascertained by postcode, grouped according to Australian Statistical Geography Standard  
40 Remoteness Structure on the basis of relative access to health care services.<sup>13</sup>  
41  
42  
43  
44  
45  
46  
47  
48  
49  
50  
51  
52  
53  
54

#### 55 Data Collection

56  
57 Data was extracted from paper and electronic hospital records, including demographics,  
58 admission duration, clinical findings, investigations, management and outcomes. The  
59  
60



1  
2  
3 characteristics assessed included age, Aboriginal status, geographical location, presence of  
4  
5 common co-morbidities and recurrent cellulitis. Data was captured and stored in a  
6  
7 standardised purpose-built REDCap database by a medically trained abstractor.<sup>14,15</sup>  
8  
9

10 Adherence to treatment duration was assessed against the IV to oral switch guidelines.<sup>16</sup>  
11  
12

#### 13 14 15 Data analysis

16  
17 Data was analysed using descriptive and comparative statistics. The proportion of Aboriginal  
18  
19 children in the study was compared to the 2016 Census data for WA using a binomial  
20  
21 probability test.<sup>17</sup> The frequency of cellulitis affecting specific body sites were compared  
22  
23 between admitted and non-admitted patients using Pearson's chi square tests and Fisher's  
24  
25 exact tests as appropriate. Analysis of variance (ANOVA) compared age at diagnosis between  
26  
27 admitted and non-admitted patients. The number of patients who attended follow-up with a  
28  
29 paediatrician was compared using Pearson's chi square test. Data was analysed using Stata  
30  
31 version 16.0 (*Stata Statistical Software: Release 16*. College Station, TX).  
32  
33  
34  
35  
36  
37  
38

#### 39 Ethics approval

40  
41 The study was approved by the Western Australian Aboriginal Health Ethics Committee (HREC  
42  
43 Ref 923) with reciprocal approval from the University of Western Australia and the GEKO  
44  
45 program at the Child and Adolescent Health Service (PRN 29036).  
46  
47  
48  
49

#### 50 Patient and Public Involvement

51  
52 Patients and members of the public were not involved in the design, conduct, reporting, or  
53  
54 dissemination plans of this research.  
55  
56  
57  
58  
59  
60

## Results

Eight-hundred and sixty-seven patients with a primary diagnosis of cellulitis presented to PCH in 2018. Hospital coding errors were present in 11.8% (102/867) of cases: 40 patients excluded with an alternative primary SSTI and 62 with different primary diagnoses coded in the ED notes compared to the discharge summary. Ninety-three patients with odontogenic cellulitis were also excluded. Of the remaining 672 patients, 206 (30.6%) were included in the 12-month admitted cohort and 96 (14.2%) in the 6-month non-admitted cohort (Figure 1). Cellulitis accounted for 1.1% (672/62,985) of all presentations and 0.8% (206/26,884) of annual admissions to PCH.

One hundred and eighty (59.6%) children were male (Table 1). Eleven (3.6%) children re-presented within the study period: 3 children with recurrent cellulitis of a different body site, 4 children with treatment failure requiring re-admission to hospital, 1 child requiring admission after unsuccessful discharge from ED and 3 children with treatment failure representing to ED.

Children below 5 years were over-represented, 147/302 (48.7%). The mean age of children admitted to hospital was 5 years (SD=4.8) and for non-admitted patients 6 years (SD=4.0).

Aboriginal children with cellulitis (40/302, 13.2%) were significantly over-represented compared to being 3.9% of the WA paediatric population ( $p < 0.01$ ). Aboriginal children were more likely to be hospitalised (36/40, 90.0%) than their non-Aboriginal peers (170/262, 64.9%).

**Table 1.** Patient Demographics

|                          |                 | Total<br>(n=302) | Admitted<br>(n=206) | Non-admitted<br>(n=96) |
|--------------------------|-----------------|------------------|---------------------|------------------------|
| Sex                      | Male            | 180 (59.6)       | 121 (58.7)          | 59 (61.5)              |
|                          | Female          | 122 (40.4)       | 85 (41.3)           | 37 (38.5)              |
| Age Group<br>(years)     | <5              | 147 (48.7)       | 100 (48.5)          | 47 (48.9)              |
|                          | 5-9             | 87 (28.8)        | 56 (27.2)           | 31 (32.3)              |
|                          | 10-14           | 52 (17.2)        | 36 (17.5)           | 16 (16.7)              |
|                          | 15              | 16 (5.3)         | 14 (6.8)            | 2 (2.1)                |
| Indigenous<br>status     | Aboriginal      | 40 (13.2)        | 36 (17.5)           | 4 (4.2)                |
|                          | Non- Aboriginal | 262 (86.8)       | 170 (82.5)          | 92 (95.8)              |
| Geographical<br>location | Metropolitan    | 282 (93.4)       | 190 (92.2)          | 92 (95.8)              |
|                          | Regional/Remote | 17 (5.6)         | 15 (7.3)            | 2 (2.1)                |
|                          | International   | 3 (1.0)          | 1 (0.5)             | 2 (2.1)                |
| Previous<br>admission    | Cellulitis      | 27 (8.9)         | 19 (9.2)            | 8 (8.3)                |
|                          | Other SSTI      | 23 (7.6)         | 21 (10.2)           | 2 (2.1)                |
| Comorbidities            | Eczema          | 18 (6.0)         | 13 (6.3)            | 5 (5.2)                |
|                          | Surgery         | 3 (1.0)          | 2 (1.0)             | 1 (1.0)                |
|                          | URTI            | 13 (4.3)         | 10 (4.9)            | 3 (3.1)                |

Values are n (%)

†Upper respiratory tract infection includes sinusitis, paranasal sinusitis and tonsillitis/pharyngitis

The most common causes of cellulitis in the study group were insect bites (66/302, 21.8%), trauma (60/302, 19.9%) and impetigo (17/302, 5.6%) (Table 2). In both groups, the most affected body location was the extremities (119/302, 39.4%). The proportion of facial cellulitis was significantly greater amongst admitted patients compared to non-admitted patients (56/206, 27.2% vs 5/96, 5.2%,  $p < 0.01$ ).

**Table 2.** Possible causes and location of cellulitis

| Possible source    | Admitted (n=206) | Non-admitted (n=96) |
|--------------------|------------------|---------------------|
| Unknown            | 76 (36.9)        | 30 (31.2)           |
| Skin sore          | 17 (8.3)         | -                   |
| Trauma             | 45 (21.8)        | 15 (15.6)           |
| Insect bite        | 31 (15.0)        | 35 (36.5)           |
| Lymphoedema        | 1 (0.5)          | -                   |
| Other†             | 36 (17.5)        | 16 (16.7)           |
| Location‡          | Admitted (n=206) | Non-admitted (n=96) |
| Face               | 56 (27.2)        | 5 (5.2)             |
| Head and neck      | 9 (4.4)          | 3 (3.1)             |
| Upper limbs        | 14 (6.8)         | 13 (13.5)           |
| Torso              | 8 (3.9)          | 7 (7.3)             |
| Groin and buttocks | 11 (5.3)         | 16 (16.7)           |
| Lower limbs        | 54 (26.2)        | 21 (21.9)           |
| Extremities        | 76 (36.9)        | 43 (44.8)           |

Values are n(%)

†other includes animal bite, recent injection site, rash, wound or foreign body infection and sinusitis

‡some cases involved infection of multiple sites

Most admitted patients (199/206, 96.6%) received IV antibiotics, frequently flucloxacillin (154/199, 77.4%) for a median duration of 2 days (IQR 2-3) before step-down to oral antibiotics (Table 3). The median duration of oral antibiotics was 6 days (IQR 5-7). The median total duration of antibiotic therapy was 8 days (IQR 7-10). The most common IV antibiotic regimen for periorbital cellulitis was IV ceftriaxone and flucloxacillin (38/46, 82.6%).

Sixteen (5.3%) admitted children were discharged to the Hospital in the Home (HITH) program for further IV antibiotics. The majority of these children had periorbital cellulitis (9/16, 56.3%).

Fifty-two patients underwent surgical procedures including subcutaneous abscess drainage (37/52, 71.2%), finger or toe-nail removal (14/52, 26.9%) and foreign body removal (1/52, 1.9%).

**Table 3.** Management and outcomes of patients admitted to PMH/PCH in 2018

|                                                       | Total<br>(n=206) | Periorbital<br>(n=46) | Other<br>(n=160) |
|-------------------------------------------------------|------------------|-----------------------|------------------|
| Duration of IV antibiotics, days,<br>median (IQR)     | 2<br>(2-3)       | 3<br>(2-3)            | 2<br>(2-3)       |
| IV antibiotic n (%):                                  | n=199            | n=45                  | n=154            |
| Flucloxacillin                                        | 154 (77.4)       | 41 (91.1)             | 113 (73.3)       |
| Cefotaxime                                            | 2 (1.0)          | 2 (4.4)               |                  |
| Ceftriaxone                                           | 47 (23.6)        | 41 (91.1)             | 6 (3.9)          |
| Cefazolin                                             | 38 (19.1)        | 5 (11.1)              | 33 (21.4)        |
| Clindamycin                                           | 10 (5.0)         | -                     | 10 (6.5)         |
| Cotrimoxazole                                         | 2 (1.0)          | -                     | 2 (1.3)          |
| Benzylpenicillin                                      | 1 (0.5)          | -                     | 1 (0.6)          |
| Piperacillin/tazobactam                               | 15 (7.5)         | 4 (8.9)               | 11 (7.1)         |
| Vancomycin                                            | 27 (13.6)        | 2 (4.4)               | 25 (16.2)        |
| Other                                                 | 3 (1.5)          | -                     | 3 (1.9)          |
| Duration of oral antibiotics, days,<br>median (IQR)   | 6<br>(5-7)       | 7<br>(5-8)            | 5<br>(5-7)       |
| Oral antibiotic on discharge, n (%):                  | n=192            | n=42                  | n=150            |
| Flucloxacillin                                        | 20 (10.4)        | 1 (2.4)               | 19 (12.7)        |
| Cephalexin                                            | 103 (53.6)       | 13 (30.9)             | 90 (60.0)        |
| Clindamycin                                           | 8 (4.2)          | 1 (2.4)               | 7 (4.7)          |
| Cotrimoxazole                                         | 20 (10.4)        | 2 (4.8)               | 18 (12.0)        |
| Amox/clav duo forte                                   | 37 (19.3)        | 24 (57.1)             | 13 (8.7)         |
| Amoxicillin                                           | 2 (1.0)          | 1 (2.4)               | 1 (0.7)          |
| Other                                                 | 4 (2.1)          | -                     | 4 (2.7)          |
| Total duration of antibiotic<br>therapy, median (IQR) | 8<br>(7-10)      | 9<br>(8-11)           | 8<br>(7-10)      |
| Surgery, n (%)                                        | 52 (25.2)        | -                     | 52 (32.5)        |
| Duration of admission, median<br>(IQR)                | 3<br>(2-4)       | 3<br>(2-4)            | 3<br>(2-4)       |
| Discharged to HITH, n (%)                             | 16<br>(7.8)      | 9<br>(19.6)           | 7<br>(4.4)       |
| Follow up with paediatrician<br>documented n(%)       | 80<br>(38.8)     | 15<br>(32.6)          | 65<br>(40.6)     |

Most non-admitted patients received oral antibiotics only (93/96, 96.9%), commonly cephalexin (70/90, 72.9%) for a median duration of 5 days (IQR 5-7) (Table S2). Documented

follow up was less likely in non-admitted patients compared to those admitted (11.5% vs 38.8%,  $p < 0.01$ ).

The most frequent investigations were full blood count, C-reactive protein and wound swab (Table 4). Blood cultures were performed in 45.6% (94/206) of admitted cases with only two positive results: *Cellulomonas* species and coagulase negative *Staphylococcus* – both probable skin contaminants. Investigations were less common in non-admitted patients.

**Table 4.** Investigations carried out in children presenting with cellulitis

|                                     | Admitted<br>(n=206) | Non-admitted<br>(n=96) |
|-------------------------------------|---------------------|------------------------|
| Full blood count performed n (%)    | 168 (81.6)          | 5 (5.2)                |
| White blood cell, mean (SD)         | 13.3 (10.2)         | 9.83 (3.5)             |
| Elevated† n (%)                     | 96 (57.1)           | 1 (20.0)               |
| C-Reactive Protein performed, n (%) | 166 (80.6)          | 5 (5.2)                |
| C-Reactive Protein, mean (SD)       | 31.1 (47.2)         | 8.3 (12.8)             |
| Elevated† n (%)                     | 111 (66.9)          | 2 (40.0)               |
| Blood culture performed, n (%)      | 94 (45.6)           | 2 (2.1)                |
| Organism identified, n (%)          | 1 (1.1)             | -                      |
| Wound swab performed, n (%)         | 120 (58.3)          | 13 (13.5)              |
| Organisms identified, n (%)         | 101 (84.1)          | 10 (76.9)              |
| Imaging, n (%)                      | 123 (59.7)          | 14 (14.5)              |
| Ultrasound scan, n (%)              | 35                  | 3                      |
| X-ray, n (%)                        | 71                  | 12                     |
| Computed tomography, n (%)          | 13                  | -                      |
| Magnetic resonance imaging, n (%)   | 4                   | -                      |

†elevated as per laboratory reported reference range

Wound swabs yielded pathogens in 36.8% (111/302) of patients. *S. aureus* was most frequently identified (n=94, 84.7%): 60 (63.8%) methicillin sensitive *S. aureus* (MSSA); 34 (36.2%) methicillin resistant *S. aureus* (MRSA); and 22 (19.8%) *S. pyogenes* (Table 5). Fourteen

children had mixed gram-positive infections: MSSA and *S. pyogenes* (n=10); MRSA and *S. pyogenes* (n=3); MSSA and MRSA (n=1). *S. pyogenes* was detected in isolation in only 9 cases.

**Table 5.** Microorganisms identified on wound swab

| Microorganism                          | Admitted<br>(n=101) | Non-admitted<br>(n=10) |
|----------------------------------------|---------------------|------------------------|
| <i>Streptococcus pyogenes</i>          | 20 (19.8)           | 2 (20.0)               |
| <i>Staphylococcus aureus</i>           | 86 (85.1)           | 8 (80.0)               |
| Methicillin Sensitive <i>S. aureus</i> | 54 (53.5)           | 6 (60.0)               |
| Methicillin Resistant <i>S. aureus</i> | 32 (31.7)           | 2 (20.0)               |
| <i>Staphylococcus lugdunensis</i> ,    | 1 (1.0)             | -                      |
| <i>Neisseria gonorrhoeae</i>           | 2 (2.0)             | -                      |
| <i>Pseudomonas aeruginosa</i>          | 1 (1.0)             | 1 (10.0)               |
| Other†                                 | 7 (6.9)             | -                      |

†other includes *Staphylococcus intermedius*, *Streptococcus dysgalactiae*, *Streptococcus intermedius*, mixed anaerobes, *Eikenella corrandes*, *Pasteurella multocida*

## Discussion

This is the first study to analyse the epidemiology and treatment of cellulitis at a tertiary paediatric centre in Australia. We have demonstrated four key findings: (i) cellulitis is common accounting for 1.1% of all presentations to the tertiary hospital; (ii) patients with facial cellulitis are more frequently admitted to hospital; (iii) children under five years and Aboriginal children are disproportionately affected by cellulitis; and (iv) 3.6% of the cohort had recurrent cellulitis.

We confirm that paediatric cellulitis accounts for a significant burden on the hospital system, consistent with previous linked data showing 3% of paediatric hospital admissions in WA were due to SSTI, with cellulitis the second most common diagnosis.<sup>5</sup> The CHOICE trial in Melbourne reported 700 presentations of cellulitis to the Royal Children's Hospital over 17-

1  
2  
3 months, with 304 (43%) admissions.<sup>18</sup> Our cohort has a higher presentation rate of  
4  
5 approximately 56 children per month compared to only 41 per month in Melbourne, whilst  
6  
7 our overall admission rate was slightly lower at 30.7%. In the Northern Territory, 2.3% of all  
8  
9 paediatric presentations to the Royal Darwin Hospital ED in 2013 were for cellulitis.<sup>19</sup>  
10  
11 Prevention of cellulitis will reduce the burden of hospitalisation on children and families.  
12  
13 Cellulitis prevention strategies include insect repellent, antiseptics for minor trauma and  
14  
15 possibly vaccination when a GAS vaccine becomes available over the next decade. A recent  
16  
17 study investigating the health and economic burden of GAS disease in Australia found that,  
18  
19 out of the 24 diseases caused by GAS, cellulitis contributed to over half the total burden in  
20  
21 both children and adults, further confirming the need for a GAS vaccine.<sup>9</sup>  
22  
23  
24  
25  
26  
27  
28  
29

30 Children with facial cellulitis are disproportionately hospitalised. This may be representative  
31  
32 of the need for multidisciplinary specialist care and the potential for sight-threatening and  
33  
34 life-threatening complications in children with periorbital cellulitis. All but one child with  
35  
36 periorbital cellulitis in our study group were admitted for IV antibiotics and specialist review  
37  
38 (ophthalmology and otolaryngology). This management is supported by in the literature,  
39  
40 which suggests that multidisciplinary management and early intervention can improve  
41  
42 outcomes for children with periorbital cellulitis.<sup>20</sup> Canadian data has also demonstrated over-  
43  
44 representation of facial cellulitis amongst paediatric inpatients (26.8%) compared to non-  
45  
46 admitted patients (16.3%) with cellulitis.<sup>21</sup> Similarly, Canadian ED presentations were also  
47  
48 predominantly extremity cellulitis (69.5%), due to insect bite (21.6%) and trauma (20.3%).<sup>21</sup>  
49  
50  
51  
52  
53  
54  
55

56  
57 Aboriginal children and children under 5 years were overrepresented. This is consistent with  
58  
59 rates of paediatric hospitalisation for SSTI in WA, showing higher rates within these two  
60



1  
2  
3 groups<sup>5</sup> and a known heavy burden of skin infections in Aboriginal children.<sup>22</sup> Vaccination  
4  
5 against *Haemophilus influenzae* type B and *S. pneumoniae* has been effective in reducing  
6  
7 periorbital cellulitis attributable to these pathogens in children below 5 years. It is likely that  
8  
9 a GAS vaccine will have a similarly significant effect for cellulitis attributable to GAS.<sup>9</sup>  
10  
11

12  
13  
14  
15 In our study 3.6% of children had recurrent cellulitis compared to rates of 22 to-49% in adults.<sup>1</sup>  
16  
17 In children, recurrent cellulitis is previously only reported in the context of lymphoedema<sup>23</sup>  
18  
19 and periorbital cellulitis associated with rhinosinusitis.<sup>24</sup> Our study demonstrates a high rate  
20  
21 of recurrent cellulitis in children without these risk factors, with MRSA common in recurrent  
22  
23 cellulitis. More studies are required to examine the risk factors for recurrent cellulitis in  
24  
25 children and inform the use of prophylactic antibiotics and prevention strategies.  
26  
27  
28  
29

30  
31  
32 The choice and duration of antibiotics was strongly adherent to international guidelines (1-3  
33  
34 days IV antibiotics, 5-7 days total duration of antibiotics for moderate-severe cellulitis).<sup>16</sup>  
35  
36 Children with periorbital cellulitis required longer treatment duration (median 3 days IV,  
37  
38 median 7 days total), which was also consistent with recommendations (2-3 days IV, 7-10 days  
39  
40 total).<sup>16</sup> Our reported length of stay is comparable to international studies of cellulitis and  
41  
42 SSTI.<sup>11,21</sup> Most non-admitted patient received oral antibiotics only, which is consistent with  
43  
44 recommendations for treatment of mild cellulitis in children.<sup>16</sup> The choice of antibiotic was  
45  
46 also consistent with the PCH antimicrobial stewardship program, ChAMP. Further  
47  
48 opportunities to improve management of children with cellulitis presenting to hospital  
49  
50 include incorporating evidence for early oral treatment using the highly bioavailable regimens  
51  
52 of clindamycin and trimethoprim/sulfamethoxazole.<sup>25</sup> Evidence for use of these agents has  
53  
54 been synthesised in recent years for children and adults. With increasing MRSA prevalence,  
55  
56  
57  
58  
59  
60

1  
2  
3 these MRSA active agents with a strong evidence base are useful for paediatricians to  
4  
5 consider.  
6  
7  
8  
9

10 Pathogen confirmation is difficult in cellulitis. We confirm the futility of blood cultures in  
11  
12 cellulitis in immunocompetent children.<sup>26</sup> Wound cultures are more helpful, with over 80% of  
13  
14 those tested yielding a positive result. Although MSSA was the most commonly cultured  
15  
16 organism, it is believed that the role of GAS may be underestimated. One study, using  
17  
18 serology in adults with cellulitis, suggested up to 73% of unculturable cellulitis is due to GAS.<sup>27</sup>  
19  
20  
21  
22  
23

24  
25 HITH referrals were uncommon despite the availability and accessibility of this program. The  
26  
27 Australian CHOICE trial demonstrated that home parenteral antibiotics are safe, effective and  
28  
29 cost-effective for children with moderate to severe cellulitis.<sup>20,28</sup> Further efforts to admit  
30  
31 children to HITH from ED would improve the quality of life for children with cellulitis. Clinicians  
32  
33 working in the ED should consider IV antibiotics via HITH as a viable and cost-effective option  
34  
35 for patients with uncomplicated cellulitis.  
36  
37  
38  
39  
40  
41

42 Limitations include the retrospective nature of the study. However, being the first study to  
43  
44 assess cellulitis in Australian children, this design allowed for initial assessment of the  
45  
46 population and the generation of hypotheses for further research. We limited the study  
47  
48 population to cases presenting to the tertiary centre therefore it may not represent all cases  
49  
50 of paediatric cellulitis in WA. In doing so, the study focuses on tertiary management which  
51  
52 provides guidance on treatment for the state. Due to time constraints of the study the data  
53  
54 collection for the non-admitted cohort was limited to the proximal six months. The data  
55  
56 observed represented less than half the expected number of non-admitted cases per annum.  
57  
58  
59  
60

1  
2  
3 The discrepancy likely arises due to the fact that cellulitis is likely more common in the  
4 summer months as reported in an adult literature.<sup>29</sup> A further limitation is the absence of  
5 blinding of the abstractor. Whilst we acknowledge this may introduce bias in retrospective  
6 chart reviews, the focus of the study was on epidemiological factors such as age, sex,  
7 Aboriginal status and body site affected, which are not susceptible to interpretation bias given  
8 they are non-objective findings. Additionally, the study population represents only moderate  
9 to severe cases of cellulitis as milder cases are usually ambulatory.<sup>30</sup>  
10  
11  
12  
13  
14  
15  
16  
17  
18  
19  
20  
21  
22

23 Based on our findings, future research should consider the effectiveness of targeted  
24 prevention strategies for the high-risk groups identified. As the progress in the development  
25 of a GAS vaccine continues it is important to develop mechanisms to monitor this burden to  
26 determine what proportion of cellulitis in childhood is preventable with a GAS vaccine.  
27  
28  
29  
30  
31  
32  
33  
34

#### 35 **Funding:**

36 This research received no specific grant from any funding agency in the public, commercial  
37 or not-for-profit sectors.  
38  
39  
40  
41

#### 42 **Competing Interests:**

43 I declare that that I have read and understood BMJ policy on declarations of interest.  
44  
45  
46  
47  
48  
49  
50  
51

52 I have no competing interests to declare.  
53  
54  
55  
56  
57  
58  
59  
60

#### 61 **Contributorship:**

62 A.B devised the study. A.B and E.S. planned the project, with input from the other authors.  
63  
64  
65  
66  
67  
68  
69  
70

E.S and C.M completed the data collection and data analysis. E.S. led the manuscript writing.

All authors provided critical feedback and helped shape the research, analysis and

1  
2  
3 manuscript. All authors meet requirements of authorship as per the ICMJE guidelines for  
4  
5 authorship.  
6  
7  
8  
9  
10  
11  
12  
13  
14  
15  
16  
17  
18  
19  
20  
21  
22  
23  
24  
25  
26  
27  
28  
29  
30  
31  
32  
33  
34  
35  
36  
37  
38  
39  
40  
41  
42  
43  
44  
45  
46  
47  
48  
49  
50  
51  
52  
53  
54  
55  
56  
57  
58  
59  
60

Confidential: For Review Only

**References:**

1. Raff AB, Kroshinsky D. Cellulitis: A review. *JAMA*. 2016;**316**(3):325-337.
2. Goodyear H. Infections and infestations of the skin. *Paediatr Child Health*. 2015;**25**(2):72-77.
3. Kilburn SA, Featherstone P, Higgins B, Brindle R. Interventions for cellulitis and erysipelas. *Cochrane Database Syst Rev*. 2010;**6**:CD004299.
4. Sartori-Valinotti JC, Newman CC. Diagnosing cellulitis for the nondermatologist. *Hosp Med Clin*. 2014;**3**(2):e202-e217.
5. Abdalla T, Hendrickx D, Fathima P *et al*. Hospital admissions for skin infections among Western Australian children and adolescents from 1996 to 2012. *PLoS One*; 2017;**12**(11):e0188803.
6. Gunderson CG, Martinello RA. A systematic review of bacteremias in cellulitis and erysipelas. *J Infect*. 2012;**64**(2):148-155.
7. Swartz MN. Cellulitis. *N Engl J Med*. 2004;**350**(9):904-912.
8. Stevens DL, Bisno AL, Chambers HF *et al*. Practice guidelines for the diagnosis and management of skin and soft tissue infections: 2014 update by the Infectious Diseases Society of America. *Clin Infect Dis*. 2014;**59**(2):e10-e52.
9. Cannon JW, Jack S, Wu Y *et al*. An economic case for a vaccine to prevent group A streptococcus skin infections. *Vaccine*. 2018;**36**(46):6968-6978
10. Larru B, Gerber JS. Cutaneous bacterial infections caused by *Staphylococcus aureus* and *Streptococcus pyogenes* in infants and children. *Pediatr Clin North Am*. 2014;**61**(2):457-478.
11. Lopez MA, Cruz AT, Kowalkowski MA, Raphael JL. Trends in resource utilization for hospitalized children with skin and soft tissue infections. *Pediatrics*. 2013;**131**(3):e718-25.
12. Lu S, Kuo DZ. Hospital charges of potentially preventable pediatric hospitalizations. *Acad Pediatr*. 2012;**12**(5):436-444.
13. Australian Bureau of Statistics. Australian Statistical Geographical Standard (ASGS): Volume 5 - Remoteness Structure. Canberra (ACT):Commonwealth of Australia; 2016. Report Number: 1270.0.55.005
14. Harris PA, Taylor R, Minor BL *et al*. The REDCap consortium: Building an international community of software platform partners. *J Biomed Inform*. 2019;**95**:103208.
15. Harris PA, Taylor R, Thielke R, Payne J, Gonzalez N, Conde JG. Research electronic data capture (REDCap)—A metadata-driven methodology and workflow process for providing translational research informatics support. *J Biomed Inform*. 2009;**42**(2):377-381.
16. McMullan BJ, Andresen D, Blyth CC *et al*. Antibiotic duration and timing of the switch from intravenous to oral route for bacterial infections in children: systematic review and guidelines. *Lancet Infect Dis*. 2016;**16**(8):e139-e152.

17. Australian Bureau of Statistics. Estimates of Aboriginal and Torres Strait Islander Australians. Canberra (ACT):Commonwealth of Australia; 2016. Report Number: 3238.0.55.001
18. Ibrahim LF, Hopper SM, Babl FE, Bryant PA. Who can have parenteral antibiotics at home?: a prospective observational study in children with moderate/severe cellulitis. *Pediatr Infect Dis J*. 2016;**35**(3):269-74.
19. Buntsma D, Lithgow A, O'Neill E *et al*. Patterns of paediatric emergency presentations to a tertiary referral centre in the Northern Territory. *Emerg Med Australas*. 2017;**29**(6):678-685.
20. Murphy DC, Meghji S., Alfiky M, Bath AP. Paediatric periorbital cellulitis: A 10-year retrospective case series review. *J Paediatr Child Health*. 2021; **57**: 227-233.
21. Kam AJ, Leal J, Freedman SB. Pediatric cellulitis: success of emergency department short-course intravenous antibiotics. *Pediatr Emerg Care*. 2010;**26**(3):171-6.
22. Bowen AC, Mahé A, Hay RJ *et al*. The global epidemiology of impetigo: A systematic review of the population prevalence of impetigo and pyoderma. *PloS One*. 2015;**10**(8):e0136789-e0136789.
23. Quéré I, Nagot N, Vikkula M. Incidence of cellulitis among children with primary lymphedema. *N Engl J Med*. 2018;**378**(21):2047-2048.
24. Tzelnick S, Soudry E, Raveh E, Gilony D. Recurrent periorbital cellulitis associated with rhinosinusitis in children: Characteristics, course of disease, and management paradigm. *Int J Pediatr Otorhinolaryngol*. 2019;**121**:26-28.
25. Bowen AC, Carapetis JR, Currie BJ, Fowler V, Jr., Chambers HF, Tong SYC. Sulfamethoxazole-Trimethoprim (Cotrimoxazole) for skin and soft tissue infections including impetigo, cellulitis, and abscess. *Open Forum Infect Dis*. 2017;**4**(4):ofx232.
26. Trenchs V, Hernandez-Bou S, Bianchi C, Arnan M, Gene A, Luaces C. Blood cultures are not useful in the evaluation of children with uncomplicated superficial skin and soft tissue infections. *Pediatr Infect Dis J*. 2015;**34**(9):924-927.
27. Jeng AMD, Beheshti MMD, Li JMD, Nathan RMD. The role of [beta]-hemolytic streptococci in causing diffuse, nonculturable cellulitis: a prospective investigation. *Medicine*. 2010;**89**(4):217-226.
28. Ibrahim LF, Huang L, Hopper SM, Dalziel K, Babl FE, Bryant PA. Intravenous ceftriaxone at home versus intravenous flucloxacillin in hospital for children with cellulitis: a cost-effectiveness analysis. *Lancet Infect Dis*. 2019;**19**(10):1101-1108.
29. Manning L, Cannon J, Dyer J, Carapetis J. Seasonal and regional patterns of lower leg cellulitis in Western Australia. *Intern Med J*. 2019;**49**(2):212-216.

1  
2  
3  
4  
5  
6  
7  
8  
9  
10  
11  
12  
13  
14  
15  
16  
17  
18  
19  
20  
21  
22  
23  
24  
25  
26  
27  
28  
29  
30  
31  
32  
33  
34  
35  
36  
37  
38  
39  
40  
41  
42  
43  
44  
45  
46  
47  
48  
49  
50  
51  
52  
53  
54  
55  
56  
57  
58  
59  
60

30. O'Sullivan C, Baker MG. Skin infections in children in a New Zealand primary care setting: exploring beneath the tip of the iceberg. *N Z Med J.* 2012 9;**125**(1351):70-9.

Confidential: For Review Only

1  
2  
3  
4  
5  
6  
7  
8  
9  
10  
11  
12  
13  
14  
15  
16  
17  
18  
19  
20  
21  
22  
23  
24  
25  
26  
27  
28  
29  
30  
31  
32  
33  
34  
35  
36  
37  
38  
39  
40  
41  
42  
43  
44  
45  
46  
47  
48  
49  
50  
51  
52  
53  
54  
55  
56  
57  
58  
59  
60

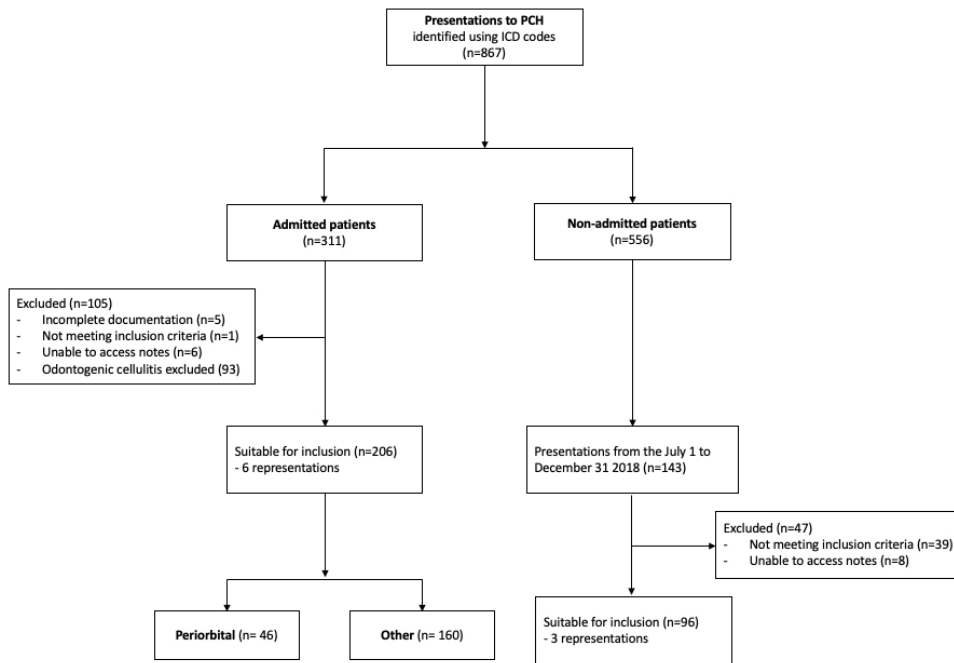

327x236mm (72 x 72 DPI)



## Supplementary Material

**Table S1.** ICD-10-AM Diagnosis Codes Used to Identify Cellulitis Presentation

| ICD Code      | Classification                    |
|---------------|-----------------------------------|
| <b>L03.01</b> | Cellulitis of Finger (ICD10)      |
| <b>L03.02</b> | Cellulitis of Toe (ICD10)         |
| <b>L03.10</b> | Cellulitis of Upper Limb (ICD10)  |
| <b>L03.11</b> | Cellulitis of Lower Limb (ICD10)  |
| <b>L03.2</b>  | Cellulitis of Face (ICD10)        |
| <b>L03.3</b>  | Cellulitis of Trunk (ICD10)       |
| <b>L03.8</b>  | Cellulitis of Other Sites (ICD10) |
| <b>L03.9</b>  | Cellulitis, Unspecified (ICD10)   |
| <b>A46</b>    | Erysipelas (ICD10)                |
| <b>H60.1</b>  | Cellulitis of external ear        |
| <b>H60.10</b> | Cellulitis of external ear        |
| <b>H60.11</b> | Cellulitis of external ear        |
| <b>H60.12</b> | Cellulitis of external ear        |
| <b>H60.13</b> | Cellulitis of external ear        |

**Table S2.** Management and outcomes of emergency presentations to PCH in 2018

|                                                        |           |
|--------------------------------------------------------|-----------|
| Duration of parenteral antibiotics, days (median, IQR) | 1 (1-1)   |
| Parenteral antibiotic, n (%):                          | n=3       |
| Ceftriaxone IM                                         | 1 (33.3)  |
| Flucloxacillin IV                                      | 1 (33.3)  |
| Cephazolin IV                                          | 1 (33.3)  |
| Duration of oral antibiotics, days, median (IQR)       | 5 (5-7)   |
| Oral antibiotic, n (%):                                |           |
| Flucloxacillin                                         | 10 (10.4) |
| Cephalexin                                             | 70 (72.9) |
| Clindamycin                                            | 1 (1.0)   |
| Cotrimoxazole                                          | 4 (4.2)   |
| Amoxicillin + clavulanic acid                          | 10 (1.0)  |
| Topical therapies                                      |           |
| Mupirocin ointment or cream                            | 6 (6.2)   |
| Bactrim ointment                                       | 1 (1.0)   |
| Chloramphenicol drops                                  | 1 (1.0)   |
| Follow up with paediatrician documented n(%)           | 11 (11.5) |

# BMJ Paediatrics Open

## Cellulitis in Children: a retrospective single centre study from Australia

|                               |                                                                                                                                                                                                                                                                                                                                                                                                                                                                                                                                                                                                                                                                                                                                                         |
|-------------------------------|---------------------------------------------------------------------------------------------------------------------------------------------------------------------------------------------------------------------------------------------------------------------------------------------------------------------------------------------------------------------------------------------------------------------------------------------------------------------------------------------------------------------------------------------------------------------------------------------------------------------------------------------------------------------------------------------------------------------------------------------------------|
| Journal:                      | <i>BMJ Paediatrics Open</i>                                                                                                                                                                                                                                                                                                                                                                                                                                                                                                                                                                                                                                                                                                                             |
| Manuscript ID                 | bmjpo-2021-001130.R1                                                                                                                                                                                                                                                                                                                                                                                                                                                                                                                                                                                                                                                                                                                                    |
| Article Type:                 | Original research                                                                                                                                                                                                                                                                                                                                                                                                                                                                                                                                                                                                                                                                                                                                       |
| Date Submitted by the Author: | 22-Jun-2021                                                                                                                                                                                                                                                                                                                                                                                                                                                                                                                                                                                                                                                                                                                                             |
| Complete List of Authors:     | Salleo, Elise; The University of Western Australia Faculty of Health and Medical Sciences, Medical School; The University of Western Australia, Telethon Kids Institute<br>Mackay, Conor; The University of Western Australia Faculty of Health and Medical Sciences, Medical School; The University of Western Australia, Telethon Kids Institute<br>Cannon, Jeffrey; The University of Western Australia Faculty of Health and Medical Sciences, Medical School; Telethon Kids Institute, Wesfarmers Centre for Vaccines and Infectious Diseases<br>King, Barbara; Albany Health Campus<br>Bowen, Asha; Perth Children's Hospital, Department of Infectious Diseases; Telethon Kids Institute, Wesfarmers Centre for Vaccines and Infectious Diseases |
| Keywords:                     | Epidemiology, Microbiology, Dermatology                                                                                                                                                                                                                                                                                                                                                                                                                                                                                                                                                                                                                                                                                                                 |
|                               |                                                                                                                                                                                                                                                                                                                                                                                                                                                                                                                                                                                                                                                                                                                                                         |

SCHOLARONE™  
Manuscripts



I, the Submitting Author has the right to grant and does grant on behalf of all authors of the Work (as defined in the below author licence), an exclusive licence and/or a non-exclusive licence for contributions from authors who are: i) UK Crown employees; ii) where BMJ has agreed a CC-BY licence shall apply, and/or iii) in accordance with the terms applicable for US Federal Government officers or employees acting as part of their official duties; on a worldwide, perpetual, irrevocable, royalty-free basis to BMJ Publishing Group Ltd ("BMJ") its licensees and where the relevant Journal is co-owned by BMJ to the co-owners of the Journal, to publish the Work in this journal and any other BMJ products and to exploit all rights, as set out in our [licence](#).

The Submitting Author accepts and understands that any supply made under these terms is made by BMJ to the Submitting Author unless you are acting as an employee on behalf of your employer or a postgraduate student of an affiliated institution which is paying any applicable article publishing charge ("APC") for Open Access articles. Where the Submitting Author wishes to make the Work available on an Open Access basis (and intends to pay the relevant APC), the terms of reuse of such Open Access shall be governed by a Creative Commons licence – details of these licences and which [Creative Commons](#) licence will apply to this Work are set out in our licence referred to above.

Other than as permitted in any relevant BMJ Author's Self Archiving Policies, I confirm this Work has not been accepted for publication elsewhere, is not being considered for publication elsewhere and does not duplicate material already published. I confirm all authors consent to publication of this Work and authorise the granting of this licence.

**Title:** Cellulitis in Children: a retrospective single centre study from Australia

**Short Title:** Cellulitis in Children

ORIGINAL ARTICLE

**Authors:** Elise Salleo<sup>1,2</sup>, Conor I. MacKay<sup>1,2</sup>, Barbara King<sup>3</sup>, Jeffrey Cannon<sup>1,4</sup> and Asha C. Bowen<sup>1,3,4</sup>

<sup>1</sup>Medical School, Faculty of Health and Medical Sciences, The University of Western Australia, Perth, Western Australia

<sup>2</sup> Telethon Kids Institute, The University of Western Australia, Perth, Western Australia

<sup>3</sup>Albany Health Campus, Western Australian Country Health Service, Albany, Western Australia

<sup>3</sup>Department of Infectious Diseases, Perth Children's Hospital, Perth, Western Australia

<sup>4</sup>Wesfarmers Centre for Vaccines and Infectious Diseases, Telethon Kids Institute, The University of Western Australia, Perth, Western Australia

**Corresponding Author:**

Dr Elise Salleo

Telethon Kids Institute

15 Hospital Ave

Nedlands WA 6009

Elise.Salleo@health.wa.gov.au

08 [6319 1000](tel:63191000)

**Key words:**

Cellulitis; skin and soft tissue infections; Children; *Staphylococcus aureus*; *Streptococcus pyogenes*

**Word Count: 2726**

## Abstract

**Aim:** To characterise the epidemiology, clinical features and treatment of paediatric cellulitis.

**Methods:** A retrospective study of children presenting to a paediatric tertiary hospital in Western Australia, Australia in 2018. All inpatient records from 1 January to 31 December 2018 and ED presentations from 1 July to 31 December 2018 were screened for inclusion.

**Results:** 302 episodes of cellulitis were included comprising 206 (68.2%) admitted children and 96 (31.8%) non-admitted children. The median age was 5 years (interquartile range [IQR] 2-9), 40 (13.2%) were Aboriginal and 180 (59.6%) male. The extremities were the most commonly affected body site amongst admitted and non-admitted patients. There was a greater proportion of facial cellulitis in admitted patients (27.2%) compared with non-admitted patients (5.2%,  $p < 0.01$ ). Wound swab was the most frequent microbiological investigation (133/302, 44.0%), yielding positive cultures in the majority of those tested (109/133, 82.0%). The most frequent organisms identified were *Staphylococcus aureus* (94/109, 86.2%) (methicillin susceptible *S. aureus* (60/94, 63.8%), methicillin resistant *S. aureus*) and *Streptococcus pyogenes* (22/109, 20.2%) with 14 identifying both *S. aureus* and *S. pyogenes*. Intravenous (IV) flucloxacillin was the preferred antibiotic (154/199, 77.4%), with median IV duration 2 days (IQR 2-3), oral 6 days (IQR 5-7) and total 8 days (IQR 7-10).

**Conclusions:** Cellulitis is a common reason for presentation to a tertiary paediatric hospital. We confirm a high prevalence of extremity cellulitis and demonstrate that children with facial cellulitis often require admission. Cellulitis disproportionately affected Aboriginal children and children below five years. Prevention of cellulitis involves early recognition and treatment of skin infections such as impetigo and scabies.

1  
2  
3  
4  
5  
6  
7  
8  
9  
10  
11  
12  
13  
14  
15  
16  
17  
18  
19  
20  
21  
22  
23  
24  
25  
26  
27  
28  
29  
30  
31  
32  
33  
34  
35  
36  
37  
38  
39  
40  
41  
42  
43  
44  
45  
46  
47  
48  
49  
50  
51  
52  
53  
54  
55  
56  
57  
58  
59  
60

What is already known on this topic:

1. Cellulitis is a common skin infection, caused by *Staphylococcus aureus* and *Streptococcus pyogenes*.
2. Cellulitis contributes the largest portion of the disease burden caused by *S. pyogenes* in Australia.
3. Cellulitis in children includes periorbital infection and infection of the extremities.

What this paper adds:

1. Cellulitis is a common condition in children accounting for 1.1% of presentations to the paediatric tertiary hospital in Western Australia.
2. Facial cellulitis is a common cause for admission to hospital, with a large proportion of this being periorbital cellulitis.
3. Children under five years and Australian Aboriginal children are disproportionately admitted for cellulitis.

## Introduction

Cellulitis is a localised skin infection caused by disruption of the physical barrier allowing pathogen entry.<sup>1,2</sup> In children it is commonly caused by trauma, insect bites or varicella, predominantly affecting the face or extremities.<sup>2-4</sup> Common pathogens are *Streptococcus pyogenes* (Group A streptococci (GAS)) and *Staphylococcus aureus*.<sup>1,2,5-7</sup> Cellulitis is non-purulent, making pathogen detection challenging, hence GAS contribution may be underestimated.<sup>1</sup> In Australia, cellulitis contributes the greatest burden of GAS disease across all ages, ahead of impetigo, pharyngitis and invasive GAS.<sup>8</sup> An improved understanding of the burden of paediatric cellulitis will inform the role for a GAS vaccine in cellulitis prevention.

Although presumably common, few studies describe the burden of cellulitis in Australian children. The proportion of admissions, clinical features and treatment of cellulitis in hospitalised children in Australia remains unknown. In one linked dataset, skin and soft tissue infections (SSTI) accounted for 3% of all paediatric hospital admissions, with cellulitis as the second most frequent admission reason.<sup>9</sup> Aboriginal children were 15 times more likely to be admitted for SSTI compared to non-Aboriginal.<sup>9</sup> Furthermore, SSTI are recognised as the most common group of bacterial infections in children.<sup>10</sup> Although cellulitis is often managed in primary care, hospitalisation is required for severe, progressive cellulitis.<sup>9,11,12</sup>

We aimed to describe the epidemiology, clinical features, treatment and adherence to antibiotic guidelines for cellulitis in children presenting to hospital.

## Methods

Study design and population

1  
2  
3 A retrospective chart review was conducted at Perth Children's Hospital (PCH), the only  
4 tertiary paediatric centre in Western Australia (WA) with an estimated 60,000 presentations  
5 to the Emergency Department (ED) annually.<sup>13</sup>  
6  
7  
8  
9

10  
11 Records with a primary diagnosis of cellulitis were identified using the International  
12 Classification of Disease (ICD) 10 coding (Table S1). At PCH, all inpatient records from 1  
13 January to 31 December 2018 were screened for inclusion. Due to the time constraints of the  
14 study ED presentations from 1 July to 31 December 2018 only were reviewed. Exclusion  
15 criteria were patients aged  $\geq 16$  years, alternative diagnosis more likely on detailed chart  
16 review or where insufficient documentation was available to assess for inclusion. Orbital  
17 cellulitis and odontogenic cellulitis were excluded from this review, as their management is  
18 considerably different from that of traditional cellulitis.  
19  
20  
21  
22  
23  
24  
25  
26  
27  
28  
29

30  
31  
32 Cellulitis (ICD10 codes L03.01 – L03.11 and H60.1 – H60.13) is a bacterial infection of the  
33 superficial layers of the skin (epidermis, dermis and subcutaneous tissues) characterised by  
34 erythema, pain, warmth, swelling and rapid progression. Recurrent cellulitis was defined as  
35 an additional admission for cellulitis occurring  $>30$  days from the index diagnosis to exclude  
36 the possibility of counting relapses or treatment failure (representation within 30 days of  
37 hospital discharge). SSTI includes cellulitis, impetigo, skin abscess, scabies and fungal  
38 infections. Extremities are the hands and feet including the finger and toes. Geographical  
39 location was ascertained by postcode, grouped according to Australian Statistical Geography  
40 Standard Remoteness Structure on the basis of relative access to health care services.<sup>14</sup>  
41  
42  
43  
44  
45  
46  
47  
48  
49  
50  
51  
52  
53

54  
55 The Hospital in the Home (HITH) service consists of a team of trained clinical nurses. It  
56 provides acute care at home for children who are medically stable and require ongoing  
57  
58  
59  
60



1  
2  
3 regular medical care. They conduct daily home visits to provide treatments such as IV  
4  
5 antibiotics, dressings and clinical assessments. Patients can be referred to HITH directly from  
6  
7 ED in order to avoid an admission or from an inpatient unit to facilitate early discharge.  
8  
9

#### 10 11 Data Collection

12  
13 Data was extracted from paper and electronic hospital records, including demographics,  
14  
15 admission duration, clinical findings, investigations, management and outcomes. The  
16  
17 characteristics assessed included age, Aboriginal status, geographical location, presence of  
18  
19 common co-morbidities and recurrent cellulitis. Data was captured and stored in a  
20  
21 standardised purpose-built REDCap database by a medically trained abstracter.<sup>15,16</sup>  
22  
23 Adherence to treatment duration was assessed against the intravenous (IV) to oral switch  
24  
25 guidelines.<sup>17</sup>  
26  
27  
28  
29  
30  
31  
32

#### 33 Data analysis

34  
35 Data was analysed using descriptive and comparative statistics. According to the 2016 Census  
36  
37 data, 3.9% of the WA paediatric population are Aboriginal.<sup>18</sup> The proportion of Aboriginal  
38  
39 children in the study was compared to the Census data using a binomial probability test. The  
40  
41 frequency of cellulitis affecting specific body sites, identified causes, investigations performed  
42  
43 and follow-up with a paediatrician were compared between admitted and non-admitted  
44  
45 patients using Pearson's chi square tests and Fisher's exact tests as appropriate. Chi square  
46  
47 tests were used to compare the age of study participants to the 2016 WA population data.<sup>19</sup>  
48  
49  
50  
51 Data was analysed using Stata version 16.0 (*Stata Statistical Software: Release 16*. College  
52  
53 Station, TX).  
54  
55  
56  
57  
58

#### 59 Ethics approval

60

1  
2  
3 The study was approved by the Western Australian Aboriginal Health Ethics Committee (HREC  
4 Ref 923) with reciprocal approval from the University of Western Australia and the GEKO  
5  
6 program at the Child and Adolescent Health Service (PRN 29036).  
7  
8  
9

#### 10 11 12 Patient and Public Involvement

13 Patients and members of the public were not involved in the design, conduct, reporting, or  
14  
15 dissemination plans of this research.  
16  
17  
18

#### 19 20 21 Results

22  
23 Eight-hundred and sixty-seven patients with a primary diagnosis of cellulitis presented to PCH  
24  
25 in 2018. This included 311 admitted patients and 556 non-admitted patients. Hospital coding  
26  
27 errors were present in 11.8% (102/867) of cases: 40 patients excluded with an alternative  
28  
29 primary SSTI and 62 with different primary diagnoses coded in the ED notes compared to the  
30  
31 discharge summary. Ninety- three patients with odontogenic cellulitis were also excluded. Of  
32  
33 the remaining 672 patients, 206 (30.6%) were included in the 12-month admitted cohort and  
34  
35 96 (14.2%) in the 6-month non-admitted cohort. Further details on the exclusion reasons are  
36  
37 presented in Figure 1. Cellulitis accounted for 1.1% (672/62,985) of all presentations and 0.8%  
38  
39 (206/26,884) of annual admissions to PCH.  
40  
41  
42  
43  
44  
45  
46  
47

48 One hundred and eighty (59.6%) children were male (Table 1). Eleven (3.6%) children re-  
49  
50 presented with cellulitis during the study period: 3 children with recurrent cellulitis of a  
51  
52 different body site, 4 children with treatment failure requiring re-admission to hospital, 1  
53  
54 child requiring admission after unsuccessful discharge from ED and 3 children with treatment  
55  
56 failure representing to ED.  
57  
58  
59  
60

**Table 1.** Patient Demographics

|                       |                 | Total (n=302) |
|-----------------------|-----------------|---------------|
| Sex                   | Male            | 180 (59.6)    |
|                       | Female          | 122 (40.4)    |
| Age Group (years)     | <5              | 147 (48.7)    |
|                       | 5-9             | 87 (28.8)     |
|                       | 10-14           | 52 (17.2)     |
|                       | 15              | 16 (5.3)      |
| Indigenous status     | Aboriginal      | 40 (13.2)     |
|                       | Non- Aboriginal | 262 (86.8)    |
| Geographical location | Metropolitan    | 282 (93.4)    |
|                       | Regional/Remote | 17 (5.6)      |
|                       | International   | 3 (1.0)       |
| Previous admission    | Cellulitis      | 27 (8.9)      |
|                       | Other SSTI      | 23 (7.6)      |
| Comorbidities         | Eczema          | 18 (6.0)      |
|                       | Surgery         | 3 (1.0)       |
|                       | URTI            | 13 (4.3)      |

Values are n (%)

Children below 5 years were over-represented in the study population, 147/302 (48.7%,  $p < 0.001$ ) (Table 2). The median age of children admitted to hospital was 5 years (IQR 2-9) and for non-admitted patients 5 years (IQR 2-8).

**Table 2.** Comparison of study participants and the WA population by age group

| Age Group (years) | Study      | WA Population† | P-value     |
|-------------------|------------|----------------|-------------|
| <5                | 147 (48.7) | 161 727 (31.9) | $p < 0.001$ |
| 5-9               | 87 (28.8)  | 164 153 (32.4) |             |
| 10-14             | 52 (17.2)  | 150 806 (29.8) |             |
| 15‡               | 16 (5.3)   | 29 934 (5.9)   |             |
| Total             | 302        | 506 620        |             |

Values are n (%)

† WA population data from the 2016 Australian census.<sup>19</sup>

‡ Children aged 16 years and above were excluded from the study

Aboriginal children with cellulitis (40/302, 13.2% [95% CI = 9.4 - 17.1%]) were significantly over-represented in the study population compared to being 3.9% of the WA paediatric population ( $p < 0.001$ ) (Table 3). Aboriginal children were more likely to be admitted to hospital (36/40, 90.0% [95%CI: 81-99%]) than their non-Aboriginal peers (170/262, 64.9% [95%CI: 59-71%],  $p < 0.001$ ) (Table 4).

**Table 3.** Comparison of study participants and the WA population by Indigenous status

|                | Study population                       | WA Population† | P-value |
|----------------|----------------------------------------|----------------|---------|
| Aboriginal     | 40 (13.2%)<br>[95% CI = 9.4 - 17.1%]   | 3.9%           | p<0.001 |
| Non-Aboriginal | 262 (86.8%)<br>[95% CI = 82.9 - 90.6%] | 96.1%          |         |
| Total          | 302 (100%)                             | 100%           |         |

† Data from the 2016 Australian Census<sup>18</sup>**Table 4.** Proportion of Aboriginal and Non-Aboriginal patients admitted to hospital

|              | Aboriginal                      | Non-Aboriginal                  | P-value |
|--------------|---------------------------------|---------------------------------|---------|
| Admitted     | 36 (90%)<br>[95% CI = 81 - 99%] | 170 (65%)<br>[95%CI = 59-71%]   | p<0.001 |
| Non-Admitted | 4 (10%)<br>[95% CI = 1-19%]     | 92 (35%)<br>[95% CI =29 – 41 %] |         |
| Total        | 40                              | 262                             |         |

Values are n (% [95% CI])

The most common causes of cellulitis in the study group were insect bites (66/302, 21.8%), trauma (60/302, 19.9%) and impetigo (17/302, 5.6%) (Table 5). In both groups, the most affected body location was the extremities (119/302, 39.4%). The proportion of facial cellulitis was significantly greater amongst admitted patients compared to non-admitted patients (56/206, 27.2% vs 5/96, 5.2%, p<0.001).

**Table 5.** Possible causes and location of cellulitis

| Possible source    | Admitted (n=206) | Non-admitted (n=96) | P-value |
|--------------------|------------------|---------------------|---------|
| Unknown            | 76 (36.9)        | 30 (31.2)           | p=0.339 |
| Skin sore          | 17 (8.3)         | 0 (0)               | p=0.004 |
| Trauma             | 45 (21.8)        | 15 (15.6)           | p=0.207 |
| Insect bite        | 31 (15.0)        | 35 (36.5)           | p<0.001 |
| Lymphoedema        | 1 (0.5)          | 0 (0)               | -       |
| Other†             | 36 (17.5)        | 16 (16.7)           | p=0.862 |
| Location‡          | Admitted (n=206) | Non-admitted (n=96) | P-value |
| Face               | 56 (27.2)        | 5 (5.2)             | p<0.001 |
| Head and neck      | 9 (4.4)          | 3 (3.1)             | p=0.758 |
| Upper limbs        | 14 (6.8)         | 13 (13.5)           | p=0.056 |
| Torso              | 8 (3.9)          | 7 (7.3)             | p=0.255 |
| Groin and buttocks | 11 (5.3)         | 16 (16.7)           | p=0.001 |
| Lower limbs        | 54 (26.2)        | 21 (21.9)           | p=0.416 |
| Extremities        | 76 (36.9)        | 43 (44.8)           | p=0.191 |

Values are n (%)

1  
2  
3 †other includes animal bite, recent injection site, rash, wound or foreign body infection and  
4 sinusitis

5 ‡some cases involved infection of multiple sites  
6  
7  
8

9 Most admitted patients (199/206, 96.6%) received IV antibiotics, frequently flucloxacillin  
10 (154/199, 77.4%) for a median duration of 2 days (IQR 2-3) before step-down to oral  
11 antibiotics (Table 6). The median duration of oral antibiotics was 6 days (IQR 5-7). The  
12 median total duration of antibiotic therapy was 8 days (IQR 7-10). The most common IV  
13 antibiotic regimen for periorbital cellulitis was IV ceftriaxone and flucloxacillin in  
14 combination (38/46, 82.6%).  
15  
16  
17  
18  
19  
20  
21  
22  
23  
24  
25

26 Sixteen (5.3%) admitted children were discharged to the HITH program for further IV  
27 antibiotics. The majority of these children had periorbital cellulitis (9/16, 56.3%).  
28  
29  
30  
31  
32

33 Fifty-two patients underwent surgical procedures including subcutaneous abscess drainage  
34 (37/52, 71.2%), finger or toe-nail removal (14/52, 26.9%) and foreign body removal (1/52,  
35 1.9%).  
36  
37  
38  
39  
40  
41  
42  
43  
44  
45  
46  
47  
48  
49  
50  
51  
52  
53  
54  
55  
56  
57  
58  
59  
60

**Table 6.** Management and outcomes of patients admitted to PMH/PCH in 2018

|                                                       | Total<br>(n=206) | Periorbital<br>(n=46) | Other<br>(n=160) |
|-------------------------------------------------------|------------------|-----------------------|------------------|
| Duration of IV antibiotics, days,<br>median (IQR)     | 2<br>(2-3)       | 3<br>(2-3)            | 2<br>(2-3)       |
| IV antibiotic n (%):                                  | n=199            | n=45                  | n=154            |
| Flucloxacillin                                        | 154 (77.4)       | 41 (91.1)             | 113 (73.3)       |
| Cefotaxime                                            | 2 (1.0)          | 2 (4.4)               |                  |
| Ceftriaxone                                           | 47 (23.6)        | 41 (91.1)             | 6 (3.9)          |
| Cefazolin                                             | 38 (19.1)        | 5 (11.1)              | 33 (21.4)        |
| Clindamycin                                           | 10 (5.0)         | -                     | 10 (6.5)         |
| Cotrimoxazole                                         | 2 (1.0)          | -                     | 2 (1.3)          |
| Benzylpenicillin                                      | 1 (0.5)          | -                     | 1 (0.6)          |
| Piperacillin/tazobactam                               | 15 (7.5)         | 4 (8.9)               | 11 (7.1)         |
| Vancomycin                                            | 27 (13.6)        | 2 (4.4)               | 25 (16.2)        |
| Other                                                 | 3 (1.5)          | -                     | 3 (1.9)          |
| Duration of oral antibiotics, days,<br>median (IQR)   | 6<br>(5-7)       | 7<br>(5-8)            | 5<br>(5-7)       |
| Oral antibiotic on discharge, n (%):                  | n=192            | n=42                  | n=150            |
| Flucloxacillin                                        | 20 (10.4)        | 1 (2.4)               | 19 (12.7)        |
| Cephalexin                                            | 103 (53.6)       | 13 (30.9)             | 90 (60.0)        |
| Clindamycin                                           | 8 (4.2)          | 1 (2.4)               | 7 (4.7)          |
| Cotrimoxazole                                         | 20 (10.4)        | 2 (4.8)               | 18 (12.0)        |
| Amox/clav duo forte                                   | 37 (19.3)        | 24 (57.1)             | 13 (8.7)         |
| Amoxicillin                                           | 2 (1.0)          | 1 (2.4)               | 1 (0.7)          |
| Other                                                 | 4 (2.1)          | -                     | 4 (2.7)          |
| Total duration of antibiotic<br>therapy, median (IQR) | 8<br>(7-10)      | 9<br>(8-11)           | 8<br>(7-10)      |
| Surgery, n (%)                                        | 52 (25.2)        | -                     | 52 (32.5)        |
| Duration of admission, median<br>(IQR)                | 3<br>(2-4)       | 3<br>(2-4)            | 3<br>(2-4)       |
| Discharged to HITH, n (%)                             | 16<br>(7.8)      | 9<br>(19.6)           | 7<br>(4.4)       |
| Follow up with paediatrician<br>documented n(%)       | 80<br>(38.8)     | 15<br>(32.6)          | 65<br>(40.6)     |

Most non-admitted patients received oral antibiotics only (95/96, 99.0%), commonly cephalexin (70/95, 73.7%) for a median duration of 5 days (IQR 5-7). Three patients received parenteral antibiotics (Table S2). Documented follow up was less likely in non-admitted patients compared to those admitted (11.5% vs 38.8%,  $p < 0.01$ ).

The most frequent investigations were full blood count, C-reactive protein and wound swab (Table 7). Blood cultures were performed in 45.6% (94/206) of admitted cases with only one positive results: coagulase negative *Staphylococcus*, a probable skin contaminant. Investigations were less common in non-admitted patients ( $p < 0.001$ ) (Table 7).

**Table 7.** Investigations carried out in children presenting with cellulitis

|                                     | Admitted<br>(n=206) | Non-admitted<br>(n=96) |             |
|-------------------------------------|---------------------|------------------------|-------------|
| Full blood count performed n (%)    | 168 (81.6)          | 5 (5.2)                | $p < 0.001$ |
| White blood cell, median (IQR)      | 11.9 (8.9-15.5)     | 8.56 (7.95-11.2)       |             |
| Elevated† n (%)                     | 96 (57.1)           | 1 (20.0)               |             |
| C-Reactive Protein performed, n (%) | 166 (80.6)          | 5 (5.2)                | $p < 0.001$ |
| C-Reactive Protein, median (IQR)    | 13.5 (5-36)         | 2.6 (2.4-5.5)          |             |
| Elevated† n (%)                     | 111 (66.9)          | 2 (40.0)               |             |
| Blood culture performed, n (%)      | 94 (45.6)           | 2 (2.1)                | $p < 0.001$ |
| Organism identified, n (%)          | 1 (1.1)             | -                      |             |
| Wound swab performed, n (%)         | 120 (58.3)          | 13 (13.5)              | $p < 0.001$ |
| Organisms identified, n (%)         | 101 (84.1)          | 10 (76.9)              |             |
| Imaging, n (%)                      | 123 (59.7)          | 14 (14.5)              | $p < 0.001$ |
| Ultrasound scan, n (%)              | 35                  | 3                      |             |
| X-ray, n (%)                        | 71                  | 12                     |             |
| Computed tomography, n (%)          | 13                  | -                      |             |
| Magnetic resonance imaging, n (%)   | 4                   | -                      |             |

†elevated as per laboratory reported reference range

Wound swabs yielded pathogens in 36.1% (109/302) of patients. *S. aureus* was most frequently identified (n=94, 86.2%): 60 (63.8%) methicillin sensitive *S. aureus* (MSSA); 34 (36.2%) methicillin resistant *S. aureus* (MRSA); and 22 (20.2%) *S. pyogenes* (Table 8). Fourteen children had mixed gram-positive infections: MSSA and *S. pyogenes* (n=10); MRSA and *S. pyogenes* (n=3); MSSA and MRSA (n=1). *S. pyogenes* was detected in isolation in only 9 cases. Eight children with recurrent cellulitis had positive wound swabs for MRSA.

**Table 8.** Microorganisms identified on wound swab

| Microorganism                          | Admitted<br>(n=99) | Non-admitted<br>(n=10) |
|----------------------------------------|--------------------|------------------------|
| <i>Streptococcus pyogenes</i>          | 20                 | 2                      |
| <i>Staphylococcus aureus</i>           | 86                 | 8                      |
| Methicillin Sensitive <i>S. aureus</i> | 54                 | 6                      |
| Methicillin Resistant <i>S. aureus</i> | 32                 | 2                      |
| <i>Staphylococcus lugdunensis</i> ,    | 1                  | -                      |
| <i>Pseudomonas aeruginosa</i>          | 1                  | 1                      |
| Other†                                 | 7                  | -                      |

†other includes *Staphylococcus intermedius*, *Streptococcus dysgalactiae*, *Streptococcus intermedius*, mixed anaerobes, *Eikenella corrandes*, *Pasteurella multocida*

## Discussion

This study demonstrates four key findings: (i) cellulitis is common accounting for 1.1% of all presentations to the tertiary hospital; (ii) patients with facial cellulitis are more frequently admitted to hospital; (iii) children under five years and Aboriginal children are disproportionately affected by cellulitis; and (iv) 3.6% of the cohort had recurrent cellulitis.

We confirm that paediatric cellulitis accounts for a significant burden on the hospital system, consistent with previous linked data showing 3% of paediatric hospital admissions in WA were due to SSTI, with cellulitis the second most common diagnosis.<sup>9</sup> The CHOICE trial in Melbourne reported 700 presentations of cellulitis to the Royal Children's Hospital over 17-months, with 304 (43%) admissions.<sup>20</sup> Our cohort has a higher presentation rate of approximately 56 children per month compared to only 41 per month in Melbourne, whilst our overall admission rate was slightly lower at 30.7%. In the Northern Territory, 2.3% of all paediatric presentations to the Royal Darwin Hospital ED in 2013 were for cellulitis, making it the 8<sup>th</sup> most common reason for presentation to the ED.<sup>21</sup> Prevention of cellulitis will reduce the burden of hospitalisation on children and families. Cellulitis prevention strategies from



1  
2  
3 current national guidelines include insect repellent, antiseptics for minor trauma<sup>22</sup> and  
4 possibly vaccination when a GAS vaccine becomes available over the next decade. A recent  
5  
6 study investigating the health and economic burden of GAS disease in Australia found that,  
7  
8 out of the 24 diseases caused by GAS, cellulitis contributed to over half the total burden in  
9  
10 both children and adults, further confirming the need for a GAS vaccine.<sup>8</sup>  
11  
12  
13  
14  
15  
16  
17

18 Children with facial cellulitis are more frequently hospitalised than children with cellulitis of  
19  
20 other sites. This may be representative of the need for multidisciplinary specialist care and  
21  
22 the potential for sight-threatening and life-threatening complications in children with  
23  
24 periorbital cellulitis. All but one child with periorbital cellulitis in our study group were  
25  
26 admitted for IV antibiotics and specialist review (ophthalmology and otolaryngology). This  
27  
28 management is supported by in the literature, which suggests that multidisciplinary  
29  
30 management and early intervention can improve outcomes for children with periorbital  
31  
32 cellulitis.<sup>23</sup> Canadian data has also demonstrated over-representation of facial cellulitis  
33  
34 amongst paediatric inpatients (26.8%) compared to non-admitted patients (16.3%) with  
35  
36 cellulitis.<sup>24</sup> Similarly, Canadian ED presentations were also predominantly extremity cellulitis  
37  
38 (69.5%), due to insect bite (21.6%) and trauma (20.3%).<sup>24</sup>  
39  
40  
41  
42  
43  
44  
45  
46

47 Aboriginal children and children under 5 years were overrepresented in the study group  
48  
49 when compared to the WA population. This is consistent with rates of paediatric  
50  
51 hospitalisation for SSTI in WA, showing higher admission rates in children under 5 years and  
52  
53 Aboriginal children,<sup>9</sup> and a known heavy burden of skin infections in Aboriginal children.<sup>25</sup>  
54  
55 Previous data from Australia demonstrates that Aboriginal children are more likely to be  
56  
57 admitted for all health conditions compared to non-Aboriginal children.<sup>26,27</sup> The greatest  
58  
59  
60

1  
2  
3 disparity in admission is for infectious diseases, including SSTI.<sup>26,27</sup> These high admission  
4 rates likely reflect disadvantages relating to the social determinants of health, including  
5 poor access to healthcare, overcrowded housing, financial concerns and living in remote  
6 locations.<sup>26</sup> It is also observed that children living further distances from healthcare centres  
7 generally present later and hence have more severe illness.<sup>27</sup> As such, it is important to  
8 address these factors to reduce the rates of cellulitis and SSTI in Aboriginal children.  
9

10  
11  
12  
13 Vaccination against *Haemophilus influenzae* type B and *S. pneumoniae* has been effective in  
14 reducing periorbital cellulitis attributable to these pathogens in children below 5 years.<sup>28,29</sup>  
15 It is likely that a GAS vaccine will have a similarly significant effect for cellulitis attributable  
16 to GAS.<sup>8</sup>  
17

18  
19  
20  
21  
22  
23  
24  
25  
26  
27  
28  
29  
30 In our study 3.6% of children had recurrent cellulitis compared to rates of 22 to-49% in adults.<sup>1</sup>  
31  
32  
33 In children, recurrent cellulitis is previously only reported in the context of lymphoedema<sup>30</sup>  
34 and periorbital cellulitis associated with rhinosinusitis.<sup>31</sup> Our study demonstrates a high rate  
35 of recurrent cellulitis in children without these risk factors, with MRSA common in recurrent  
36 cellulitis. More studies are required to examine the risk factors for recurrent cellulitis in  
37 children and inform the use of prophylactic antibiotics and prevention strategies.  
38  
39  
40  
41  
42  
43  
44  
45  
46

47  
48  
49  
50  
51  
52  
53  
54  
55  
56  
57  
58  
59  
60  
The choice and duration of antibiotics was strongly adherent to international guidelines (1-3  
days IV antibiotics, 5-7 days total duration of antibiotics for moderate-severe cellulitis).<sup>17</sup>  
Children with periorbital cellulitis required longer treatment duration (median 3 days IV,  
median 7 days total), which was also consistent with recommendations (2-3 days IV, 7-10 days  
total).<sup>17</sup> Our reported length of stay is comparable to international studies of cellulitis and  
SSTI.<sup>11,24</sup> Most non-admitted patient received oral antibiotics only, which is consistent with

1  
2  
3 recommendations for treatment of mild cellulitis in children.<sup>17</sup> The choice of antibiotic was  
4 also consistent with the PCH antimicrobial stewardship program, ChAMP. Further  
5 opportunities to improve management of children with cellulitis presenting to hospital  
6 include incorporating evidence for early oral treatment using the highly bioavailable regimens  
7 of clindamycin and trimethoprim/sulfamethoxazole.<sup>32</sup> Evidence for use of these agents has  
8 been synthesised in recent years for children and adults to treat purulent cellulitis and other  
9 uncomplicated SSTI in the outpatient setting. With increasing MRSA prevalence, these MRSA  
10 active agents with a strong evidence base are useful for paediatricians to consider.  
11  
12  
13  
14  
15  
16  
17  
18  
19  
20  
21  
22  
23  
24

25 Pathogen confirmation is difficult in cellulitis. We confirm the futility of blood cultures in  
26 cellulitis in immunocompetent children.<sup>33</sup> Wound cultures are more helpful, with over 80% of  
27 those tested yielding a positive result. Although MSSA was the most commonly cultured  
28 organism, it is believed that the role of GAS may be underestimated. One study, using  
29 serology in adults with cellulitis, suggested up to 73% of unculturable cellulitis is due to GAS.<sup>34</sup>  
30  
31  
32  
33  
34  
35  
36  
37  
38  
39

40 HITH referrals were uncommon despite the availability and accessibility of this program. The  
41 Australian CHOICE trial demonstrated that home parenteral antibiotics are safe, effective and  
42 cost-effective for children with moderate to severe cellulitis.<sup>23,35</sup> Further efforts to admit  
43 children to HITH from ED would improve the quality of life for children with cellulitis, however  
44 it appears that this is not currently common practice. Ibrahim et al., found that there are  
45 several barriers to clinicians choosing home treatment with IV antibiotics including younger  
46 age, risk of complications, risk of deteriorating unnoticed and risk of needing to represent to  
47 hospital.<sup>36</sup> Further education of ED clinicians could reduce these perceived barriers to home  
48  
49  
50  
51  
52  
53  
54  
55  
56  
57  
58  
59  
60

1  
2  
3 IV antibiotics. ED clinicians should strongly consider IV antibiotics via HITH as a viable and  
4  
5 cost-effective option for suitable patients with uncomplicated cellulitis.  
6  
7  
8  
9

10 Limitations include the retrospective nature of the study, however, this design allowed for  
11  
12 initial assessment of the population and the generation of hypotheses for further research.  
13  
14 We limited the study population to children with a primary diagnosis of cellulitis presenting  
15  
16 to the tertiary centre therefore, it does not include children who presented to the hospital  
17  
18 with an alternative diagnosis but were also treated for cellulitis or children managed in  
19  
20 primary care.. In doing so, the study focuses on tertiary management which provides  
21  
22 guidance on treatment for the state. Due to time constraints of the study the data collection  
23  
24 for the non-admitted cohort was limited to the proximal six months. The data observed  
25  
26 represented less than half the expected number of non-admitted cases per annum. The  
27  
28 discrepancy likely arises due to the fact that cellulitis is likely more common in the summer  
29  
30 months as reported in an adult literature.<sup>37</sup> A further limitation is the absence of blinding of  
31  
32 the abstractor. Whilst we acknowledge this may introduce bias in retrospective chart reviews,  
33  
34 the focus of the study was on epidemiological factors such as age, sex, Aboriginal status and  
35  
36 body site affected, which are not susceptible to interpretation bias given they are objective  
37  
38 findings. Additionally, the study population represents only moderate to severe cases of  
39  
40 cellulitis as milder cases are usually ambulatory.<sup>38</sup>  
41  
42  
43  
44  
45  
46  
47  
48  
49  
50  
51

52 Based on our findings, future research should consider the effectiveness of targeted  
53  
54 prevention strategies for the high-risk groups identified. Cellulitis is an important cause for  
55  
56 young and Aboriginal children to be admitted to hospital in Australia. Prevention of childhood  
57  
58  
59  
60

1  
2  
3 cellulitis requires a multifaceted approach to preventing insect bites, reducing minor trauma  
4  
5 and in the future may also include use of a GAS vaccine.  
6  
7  
8  
9

#### 10 **Funding:**

11  
12 This research received no specific grant from any funding agency in the public, commercial  
13  
14 or not-for-profit sectors.  
15  
16

#### 17 **Competing Interests:**

18 I declare that that I have read and understood BMJ policy on declarations of interest.  
19  
20

21 I have no competing interests to declare.  
22  
23  
24  
25  
26  
27

#### 28 **Contributorship:**

29 A.B devised the study. A.B and E.S. planned the project, with input from the other authors.  
30  
31

32 E.S and C.M completed the data collection and data analysis. E.S. led the manuscript writing.  
33  
34

35 All authors provided critical feedback and helped shape the research, analysis and  
36  
37 manuscript. All authors meet requirements of authorship as per the ICMJE guidelines for  
38  
39 authorship.  
40  
41  
42  
43  
44  
45  
46  
47  
48  
49  
50  
51  
52  
53  
54  
55  
56  
57  
58  
59  
60

**References:**

1. Raff AB, Kroshinsky D. Cellulitis: A review. *JAMA*. 2016;**316**(3):325-337.
2. Goodyear H. Infections and infestations of the skin. *Paediatr Child Health*. 2015;**25**(2):72-77.
3. Kilburn SA, Featherstone P, Higgins B, Brindle R. Interventions for cellulitis and erysipelas. *Cochrane Database Syst Rev*. 2010;**6**:CD004299.
4. Sartori-Valinotti JC, Newman CC. Diagnosing cellulitis for the nondermatologist. *Hosp Med Clin*. 2014;**3**(2):e202-e217.
5. Gunderson CG, Martinello RA. A systematic review of bacteremias in cellulitis and erysipelas. *J Infect*. 2012;**64**(2):148-155.
6. Swartz MN. Cellulitis. *N Engl J Med*. 2004;**350**(9):904-912.
7. Stevens DL, Bisno AL, Chambers HF *et al*. Practice guidelines for the diagnosis and management of skin and soft tissue infections: 2014 update by the Infectious Diseases Society of America. *Clin Infect Dis*. 2014;**59**(2):e10-e52.
8. Cannon JW, Jack S, Wu Y *et al*. An economic case for a vaccine to prevent group A streptococcus skin infections. *Vaccine*. 2018;**36**(46):6968-6978
9. Abdalla T, Hendrickx D, Fathima P *et al*. Hospital admissions for skin infections among Western Australian children and adolescents from 1996 to 2012. *PLoS One*; 2017;**12**(11):e0188803.
10. Larru B, Gerber JS. Cutaneous bacterial infections caused by *Staphylococcus aureus* and *Streptococcus pyogenes* in infants and children. *Pediatr Clin North Am*. 2014;**61**(2):457-478.
11. Lopez MA, Cruz AT, Kowalkowski MA, Raphael JL. Trends in resource utilization for hospitalized children with skin and soft tissue infections. *Pediatrics*. 2013;**131**(3):e718-25.
12. Lu S, Kuo DZ. Hospital charges of potentially preventable pediatric hospitalizations. *Acad Pediatr*. 2012;**12**(5):436-444.
13. Child and Adolescent Health Service. Child and Adolescent Health Service 2018-19 Annual Report. Perth (WA); 2019.
14. Australian Bureau of Statistics. Australian Statistical Geographical Standard (ASGS): Volume 5 - Remoteness Structure. Canberra (ACT):Commonwealth of Australia; 2016. Report Number: 1270.0.55.005
15. Harris PA, Taylor R, Minor BL *et al*. The REDCap consortium: Building an international community of software platform partners. *J Biomed Inform*. 2019;**95**:103208.
16. Harris PA, Taylor R, Thielke R, Payne J, Gonzalez N, Conde JG. Research electronic data capture (REDCap)—A metadata-driven methodology and workflow process for providing translational research informatics support. *J Biomed Inform*. 2009;**42**(2):377-381.

17. McMullan BJ, Andresen D, Blyth CC *et al*. Antibiotic duration and timing of the switch from intravenous to oral route for bacterial infections in children: systematic review and guidelines. *Lancet Infect Dis*. 2016;**16**(8):e139-e152.
18. Australian Bureau of Statistics. Estimates of Aboriginal and Torres Strait Islander Australians. Canberra (ACT):Commonwealth of Australia; 2016. Report Number: 3238.0.55.001
19. Australian Bureau of Statistics. Census of Population and Housing: Time Series Profile, Australia, 2016. Canberra (ACT):Commonwealth of Australia; 2016. Report Number: 2003.0
20. Ibrahim LF, Hopper SM, Babl FE, Bryant PA. Who can have parenteral antibiotics at home?: a prospective observational study in children with moderate/severe cellulitis. *Pediatr Infect Dis J*. 2016;**35**(3):269-74.
21. Buntsma D, Lithgow A, O'Neill E *et al*. Patterns of paediatric emergency presentations to a tertiary referral centre in the Northern Territory. *Emerg Med Australas*. 2017;**29**(6):678-685.
22. RHD Action *National healthy skin guideline: for the prevention, treatment and public health control of impetigo, scabies, crusted scabies and tinea for Indigenous populations and communities in Australia*. 1st edn, 2018
23. Murphy DC, Meghji S., Alfiky M, Bath AP. Paediatric periorbital cellulitis: A 10-year retrospective case series review. *J Paediatr Child Health*. 2021; **57**: 227-233.
24. Kam AJ, Leal J, Freedman SB. Pediatric cellulitis: success of emergency department short-course intravenous antibiotics. *Pediatr Emerg Care*. 2010;**26**(3):171-6.
25. Bowen AC, Mahé A, Hay RJ *et al*. The global epidemiology of impetigo: A systematic review of the population prevalence of impetigo and pyoderma. *PLoS One*. 2015;**10**(8):e0136789-e0136789.
26. Falster K, Banks E, Lujic S *et al*. Inequalities in pediatric avoidable hospitalizations between Aboriginal and non-Aboriginal children in Australia: a population data linkage study. *BMC Pediatrics*. 2016;**16**(1):169.
27. Dossetor PJ, Martiniuk ALC, Fitzpatrick JP *et al*. Pediatric hospital admissions in Indigenous children: a population-based study in remote Australia. *BMC Pediatr*. 2017;**17**(1):195.
28. Ambati BK, Ambati J, Azar N *et al*. Periorbital and orbital cellulitis before and after the advent of Haemophilus influenzae type B vaccination. *Ophthalmology*. 2000;**107**(8):1450-3.
29. Walls A, Pierce M, Krishnan N, *et al*. Pediatric head and neck complications of Streptococcus pneumoniae before and after PCV7 vaccination. *Otolaryngol Head Neck Surg*. 2015;**152**(2):336-41

- 1  
2  
3 30. Quéré I, Nagot N, Vikkula M. Incidence of cellulitis among children with primary  
4 lymphedema. *N Engl J Med*. 2018;**378**(21):2047-2048.  
5  
6 31. Tzelnick S, Soudry E, Raveh E, Gilony D. Recurrent periorbital cellulitis associated with  
7 rhinosinusitis in children: Characteristics, course of disease, and management paradigm. *Int*  
8 *J Pediatr Otorhinolaryngol*. 2019;**121**:26-28.  
9  
10 32. Bowen AC, Carapetis JR, Currie BJ, Fowler V, Jr., Chambers HF, Tong SYC.  
11 Sulfamethoxazole-Trimethoprim (Cotrimoxazole) for skin and soft tissue infections including  
12 impetigo, cellulitis, and abscess. *Open Forum Infect Dis*. 2017;**4**(4):ofx232.  
13  
14 33. Trenchs V, Hernandez-Bou S, Bianchi C, Arnan M, Gene A, Luaces C. Blood cultures are  
15 not useful in the evaluation of children with uncomplicated superficial skin and soft tissue  
16 infections. *Pediatr Infect Dis J*. 2015;**34**(9):924-927.  
17  
18 34. Jeng AMD, Beheshti MMD, Li JMD, Nathan RMD. The role of [beta]-hemolytic  
19 streptococci in causing diffuse, nonculturable cellulitis: a prospective investigation.  
20 *Medicine*. 2010;**89**(4):217-226.  
21  
22 35. Ibrahim LF, Huang L, Hopper SM, Dalziel K, Babl FE, Bryant PA. Intravenous ceftriaxone  
23 at home versus intravenous flucloxacillin in hospital for children with cellulitis: a cost-  
24 effectiveness analysis. *Lancet Infect Dis*. 2019;**19**(10):1101-1108.  
25  
26 36. Ibrahim LF, Babl FE, Hopper SM, et al. Cellulitis: oral versus intravenous and home versus  
27 hospital—what makes clinicians decide? *Arch Dis Child*. 2020;**105**(4):413.  
28  
29 37. Manning L, Cannon J, Dyer J, Carapetis J. Seasonal and regional patterns of lower leg  
30 cellulitis in Western Australia. *Intern Med J*. 2019;**49**(2):212-216.  
31  
32 38. O'Sullivan C, Baker MG. Skin infections in children in a New Zealand primary care  
33 setting: exploring beneath the tip of the iceberg. *N Z Med J*. 2012 9;**125**(1351):70-9.  
34  
35  
36  
37  
38  
39  
40  
41  
42  
43  
44  
45  
46  
47  
48  
49  
50  
51  
52  
53  
54  
55  
56  
57  
58  
59  
60



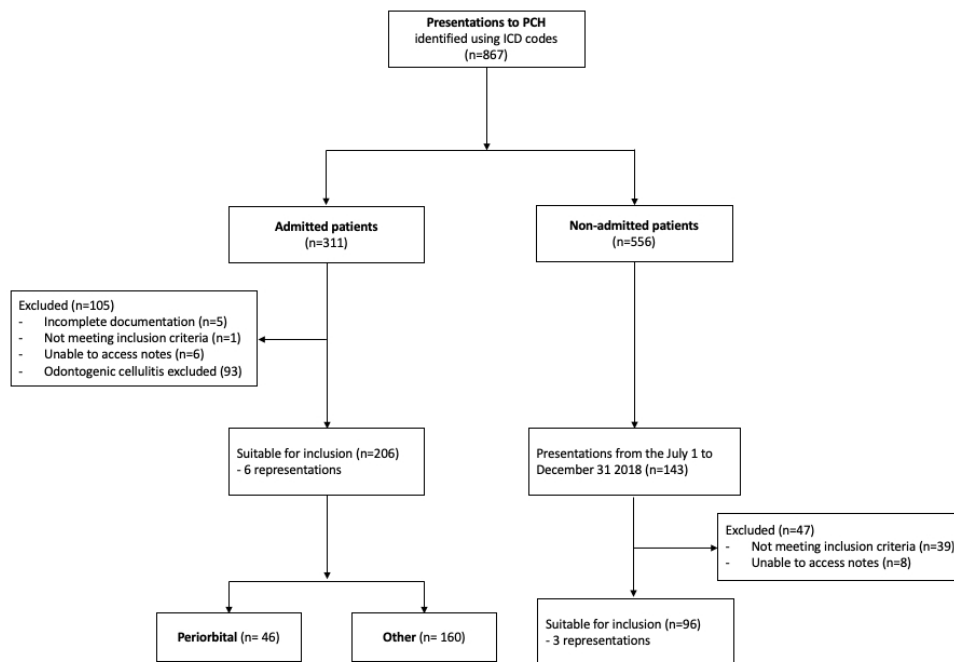

Figure 1. Flow diagram of participants included in the study.

327x236mm (72 x 72 DPI)

## Supplementary Material

**Table S1.** ICD-10-AM Diagnosis Codes Used to Identify Cellulitis Presentation

| ICD Code      | Classification                    |
|---------------|-----------------------------------|
| <b>L03.01</b> | Cellulitis of Finger (ICD10)      |
| <b>L03.02</b> | Cellulitis of Toe (ICD10)         |
| <b>L03.10</b> | Cellulitis of Upper Limb (ICD10)  |
| <b>L03.11</b> | Cellulitis of Lower Limb (ICD10)  |
| <b>L03.2</b>  | Cellulitis of Face (ICD10)        |
| <b>L03.3</b>  | Cellulitis of Trunk (ICD10)       |
| <b>L03.8</b>  | Cellulitis of Other Sites (ICD10) |
| <b>L03.9</b>  | Cellulitis, Unspecified (ICD10)   |
| <b>A46</b>    | Erysipelas (ICD10)                |
| <b>H60.1</b>  | Cellulitis of external ear        |
| <b>H60.10</b> | Cellulitis of external ear        |
| <b>H60.11</b> | Cellulitis of external ear        |
| <b>H60.12</b> | Cellulitis of external ear        |
| <b>H60.13</b> | Cellulitis of external ear        |

**Table S2.** Management and outcomes of emergency presentations to PCH in 2018

|                                                        |           |
|--------------------------------------------------------|-----------|
| Duration of parenteral antibiotics, days (median, IQR) | 1 (1-1)   |
| Parenteral antibiotic, n (%):                          | n=3       |
| Ceftriaxone IM                                         | 1 (33.3)  |
| Flucloxacillin IV                                      | 1 (33.3)  |
| Cephazolin IV                                          | 1 (33.3)  |
| Duration of oral antibiotics, days, median (IQR)       | 5 (5-7)   |
| Oral antibiotic, n (%):                                |           |
| Flucloxacillin                                         | 10 (10.4) |
| Cephalexin                                             | 70 (72.9) |
| Clindamycin                                            | 1 (1.0)   |
| Cotrimoxazole                                          | 4 (4.2)   |
| Amoxicillin + clavulanic acid                          | 10 (10.4) |
| Topical therapies                                      |           |
| Mupirocin ointment or cream                            | 6 (6.2)   |
| Bactrim ointment                                       | 1 (1.0)   |
| Chloramphenicol drops                                  | 1 (1.0)   |
| Follow up with paediatrician documented n(%)           | 11 (11.5) |
