# Supplementary material for: Cellulitis in children: a retrospective single centre study from Australia
Source: PubMed Central journal article supplement — BMJ Paediatr Open. 2021 Jul 16;5(1):e001130. doi: 10.1136/bmjpo-2021-001130 (PMC8287612; doi:10.1136/bmjpo-2021-001130), 2021-07-16
Supplement: bmjpo-2021-001130supp001.pdf [file bmjpo-2021-001130supp001.pdf]

## Supplementary Material

**Table S1.** ICD-10-AM Diagnosis Codes Used to Identify Cellulitis Presentation

| ICD Code      | Classification                    |
|---------------|-----------------------------------|
| <b>L03.01</b> | Cellulitis of Finger (ICD10)      |
| <b>L03.02</b> | Cellulitis of Toe (ICD10)         |
| <b>L03.10</b> | Cellulitis of Upper Limb (ICD10)  |
| <b>L03.11</b> | Cellulitis of Lower Limb (ICD10)  |
| <b>L03.2</b>  | Cellulitis of Face (ICD10)        |
| <b>L03.3</b>  | Cellulitis of Trunk (ICD10)       |
| <b>L03.8</b>  | Cellulitis of Other Sites (ICD10) |
| <b>L03.9</b>  | Cellulitis, Unspecified (ICD10)   |
| <b>A46</b>    | Erysipelas (ICD10)                |
| <b>H60.1</b>  | Cellulitis of external ear        |
| <b>H60.10</b> | Cellulitis of external ear        |
| <b>H60.11</b> | Cellulitis of external ear        |
| <b>H60.12</b> | Cellulitis of external ear        |
| <b>H60.13</b> | Cellulitis of external ear        |

**Table S2.** Management and outcomes of emergency presentations to PCH in 2018

|                                                        |           |
|--------------------------------------------------------|-----------|
| Duration of parenteral antibiotics, days (median, IQR) | 1 (1-1)   |
| Parenteral antibiotic, n (%):                          |           |
| Ceftriaxone IM                                         | 1 (33.3)  |
| Flucloxacillin IV                                      | 1 (33.3)  |
| Cephazolin IV                                          | 1 (33.3)  |
| Duration of oral antibiotics, days, median (IQR)       | 5 (5-7)   |
| Oral antibiotic, n (%):                                |           |
| Flucloxacillin                                         | 10 (10.4) |
| Cephalexin                                             | 70 (72.9) |
| Clindamycin                                            | 1 (1.0)   |
| Cotrimoxazole                                          | 4 (4.2)   |
| Amoxicillin + clavulanic acid                          | 10 (10.4) |
| Topical therapies                                      |           |
| Mupirocin ointment or cream                            | 6 (6.2)   |
| Bactrim ointment                                       | 1 (1.0)   |
| Chloramphenicol drops                                  | 1 (1.0)   |
| Follow up with paediatrician documented n(%)           | 11 (11.5) |
